# 1 Subspace-constrained approaches to low-rank 2 fMRI acceleration

3 Harry T. Mason<sup>1</sup>, Nadine N. Graedel<sup>2</sup>, Karla L. Miller<sup>1</sup>, Mark Chiew<sup>1</sup>

4 <sup>1</sup>*Wellcome Centre for Integrative Neuroscience, FMRIB Centre, University of Oxford, Oxford, United Kingdom,*

5 <sup>2</sup>*Wellcome Centre for Human Neuroimaging, UCL Institute of Neurology, London, United Kingdom*

6

7

## 8 **Abstract**

9

10 Acceleration methods in fMRI aim to reconstruct high fidelity images from undersampled k-space, allowing fMRI  
11 datasets to achieve higher temporal resolution, reduced physiological noise aliasing, and increased statistical  
12 degrees of freedom. While low levels of acceleration are typically part of standard fMRI protocols through parallel  
13 imaging, there exists the potential for approaches that allow much greater acceleration. One such existing approach  
14 is k-t FASTER, which exploits the inherent low-rank nature of fMRI. In this paper, we present a reformulated  
15 version of k-t FASTER which includes additional L2 constraints within a low-rank framework.

16

17 We evaluated the effect of three different constraints against existing low-rank approaches to fMRI reconstruction:  
18 Tikhonov constraints, low-resolution priors, and temporal subspace smoothness. The different approaches are  
19 separately tested for robustness to undersampling and thermal noise levels, in both retrospectively and  
20 prospectively-undersampled finger-tapping task fMRI data. Reconstruction quality is evaluated by accurate  
21 reconstruction of low-rank subspaces and activation maps.

22

23 The use of L2 constraints were found to achieve consistently improved results, producing high fidelity  
24 reconstructions of statistical parameter maps at higher acceleration factors and lower SNR values than existing  
25 methods, but at a cost of longer computation time. In particular, the Tikhonov constraint proved very robust across  
26 all tested datasets, and the temporal subspace smoothness constraint provided the best reconstruction scores in the  
27 prospectively-undersampled dataset. These results demonstrate that regularized low-rank reconstruction of fMRI  
28 data can recover functional information at high acceleration factors without the use of any model-based spatial  
29 constraints.

30

31

## 32 **Highlights**

- 33 • We introduce an alternate implementation of low-rank fMRI reconstruction by using alternating  
34 minimization, which allows for easy integration of the subspace-specific L2 constraints
- 35 • We use the alternating minimization approach to accelerate FMRI by exploiting coil sensitivity, low-rank  
36 structures, and additional L2 constraints
- 37 • We found Tikhonov and Temporal Subspace Smoothness constraints show improved performance over  
38 other methods for R=15-30
- 39 • Tikhonov Constraints were the most robust of the constrained-subspace methods, with the shortest  
40 reconstruction time
- 41 • Temporal Subspace Smoothness produced the highest reconstruction scores in the prospectively under-  
42 sampled data

43

44

## 1. Introduction

45

46 fMRI is a non-invasive, whole-brain functional imaging technique that suffers from a trade-off between temporal  
47 and spatial resolution. Acceleration aims to increase the temporal resolution without loss of spatial resolution  
48 through higher sampling efficiency in conjunction with advanced image reconstruction that leverages additional  
49 information and/or constraints. By providing increased temporal degrees of freedom in a given scan duration,  
50 acceleration can: improve sensitivity to temporal features of the haemodynamic response; reduce physiological  
51 noise aliasing; and improve statistical power. Depending on the application, the increased sampling efficiency  
52 garnered from acceleration could also be used to reduce scan times, or to increase the spatial resolution.

53

54 Various acceleration techniques have been widely adopted for fMRI. Parallel imaging methods rely on the spatial  
55 variation of sensitivity profiles of multi-channel receiver coils, which provide additional spatial information in  
56 image reconstruction. This can occur in the image domain (e.g. SENSE [1]) or in the sampling domain (e.g. GRAPPA  
57 [2]). Simultaneous multi-slice imaging [3], [4] extends these in-plane techniques to accelerate across slices without  
58 reduction factor SNR penalties, increasing the achievable temporal resolution. Parallel imaging is conventionally a  
59 timepoint-by-timepoint approach that does not leverage any temporal information during reconstruction.

60

61 Methods which do jointly consider k-space and time are known as k-t methods and can be broadly separated into  
62 three categories: methods which make a strong assumption about the spatiotemporal structure [5]–[8], methods  
63 which make a strong assumption about sparsity within a pre-defined basis set (compressed sensing approaches)  
64 [9]–[13], and methods which assume the data fits a globally low-rank model [14], [15]. There are also approaches  
65 which combine these methods [13], [16]–[20]. By focusing on redundancies or structural features in k-t space, k-t  
66 methods have the potential for much greater degrees of acceleration than time-independent methods due to the  
67 extra dimension of shared information.

68

69 Compressed sensing approaches use L1 constraints methods to promote sparsity in reconstruction. These  
70 approaches have proven very effective in other fields of dynamic MRI reconstruction, but have had relatively limited  
71 adoption in fMRI, likely due to difficulty finding suitable sparse representations for the relatively subtle BOLD  
72 signals. While initial exploratory work in compressed sensing reconstruction for fMRI focused on spatial-domain  
73 sparse transformations [10], [11], most recent work incorporating sparsity assumptions have focused instead on  
74 sparsifying the temporal domain [21], [22]. Low rank + Sparse (L+S) methods [19], [20], are a recent set of  
75 combined approaches that aim to isolate the functional information in the sparse component of the reconstruction  
76 [23], [24] while capturing the non-sparse background in the low-rank component. The result of this approach is that  
77 the rank in the L component is kept very low and that the majority of the important BOLD information is in the S  
78 component, with PEAR [25] a notable recent example that explored the idea of capturing more BOLD information  
79 in the L component.

80

81 An alternative to sparse modelling of the BOLD signals is a conceptually simpler approach based on a regularized  
82 globally low-rank model of the fMRI data. There is a correspondence between the approaches that use training data  
83 to estimate a sparse or low-dimensional basis [13], [26] and low-rank models, since low-rank models by definition  
84 have few non-trivial components (i.e. the singular value distribution is sparse). However, low-rank models do not  
85 require prior knowledge of the sparse bases, and instead estimate the spatio-temporal basis representations for the  
86 data. The inherent low-rank nature of fMRI [15], which can be understood as the combination of a few spatially  
87 coherent temporal processes (i.e. activation maps that identify voxels with a common time-series), forms one such  
88 exploitable structure in a k-t representation of the data. In analysis of fMRI data, for example, a dimensionality

89 reduction is often applied as a pre-processing step [27], which explicitly enforces a low-rank representation of the  
90 system prior to resting-state analysis methods such as independent component analysis (ICA) [28]–[30]. Various  
91 noise sources (e.g. thermal noise, physiological noise, etc.), motion, and image artefacts make the system only  
92 approximately low rank, although some confounds can also be estimated as low-rank processes [31].

93  
94 Globally, low-rank methods can be used to represent space-time data as a spatial subspace paired with a temporal  
95 subspace and associated weighting factors. The Partially Separable Functions method (k-t PSF) [14], [32] is a data-  
96 driven approach that first identifies a temporal subspace from fully-sampled low spatial resolution and high  
97 temporal resolution training data, and then uses this to reconstruct a high resolution spatial subspace from under-  
98 sampled data. An alternative rank-constrained approach is k-t FASTER (fMRI Accelerated in Space- Time via  
99 Truncation of Effective Rank [15], [33]), which jointly identifies the subspaces that best describe the acquired data.  
100 Importantly, the only constraint imposed by k-t FASTER is that of fixed rank. The rank constraint alone is enough  
101 to achieve modest acceleration factors [15], but rank-constrained methods may also be combined with coil  
102 sensitivity information and non-Cartesian sampling [33] for increased acceleration.

103  
104 In addition to the rank and coil sensitivity constraints, other information may also be incorporated into the  
105 reconstruction. Tikhonov regularization prevents overfitting on the temporal and spatial components, and serves as  
106 a way to penalize the energy content of the reconstruction. Radial k-space trajectories have a higher sampling  
107 density in central k-space than peripheral k-space, and so reweighting the low-resolution k-space could allow the  
108 reconstruction to be more strongly constrained in the densely sampled centre of k-space. The importance of central  
109 k-space more generally in MRI reconstruction has previously been used in approaches such as keyhole [8], k-t  
110 SPARSE [9], and k-t PCA [16]. Temporal regularization of some form has previously been incorporated into fMRI  
111 reconstruction in approaches like Dual TRACER [34] and temporal smoothness for simultaneous multi-slice EPI  
112 [35]. With a temporally varying sampling scheme, such as golden angle radial sampling (e.g. TURBINE [36]),  
113 enforcing temporal smoothness can be an effective way to reduce aliasing artefacts with a fractional penalty to the  
114 resulting temporal degrees of freedom.

115  
116 In this paper, we explore extensions to the k-t FASTER approach that are formulated within an alternating  
117 minimization framework that incorporates L2-based regularization in addition to the previous fixed-rank  
118 constraints. We explore specific L2 constraints that correspond to Tikhonov regularization, low-resolution priors,  
119 and temporal subspace smoothness. Using L2-based constraints allows for interpretations of the constraints as  
120 Gaussian priors, and they are robust and relatively simple to implement. We compare the proposed approaches to  
121 unconstrained k-t FASTER and k-t PSF reconstructions of retrospectively and prospectively under-sampled  
122 datasets, which can be conceived of as special cases within this regularization framework. We evaluate these  
123 different methods with regards to the accuracy of the spatial and temporal components, and the sensitivity and  
124 specificity of statistical parameter maps (activation).

125  
126  
127  
128  
129  
130  
131  
132  
133

## 2. Material and methods

### 2.1 Theory

#### 2.1.1 Reformulation of k-t FASTER

The original k-t FASTER methodology used an iterative hard threshold + matrix shrinking approach [15] to enforce a fixed low-rank constraint on the reconstructed image time series. To enable us to easily introduce additional constraints on the spatial and temporal subspaces, we reformulate this low-rank optimization as a matrix factorization problem:

$$X, T = \operatorname{argmin}_{X, T} (\|E(X * T') - d\|_2^2) \text{ such that } \operatorname{rank}(X) = \operatorname{rank}(T) = r \quad (1)$$

Equation 1 uses the following variables - E: sampling and multi-coil encoding function; d: multi-coil under-sampled k-t fMRI data; X: spatial components of decomposition; T: temporal components ( $T'$  = Hermitian adjoint of T);  $\| \cdot \|_2$ : L2 norm, and r: rank constraint. For non-Cartesian sampling, E will contain an NUFFT operator [37]. The rank constraint will also apply to equations 2-5, but will be omitted for.

To solve the non-convex low-rank reconstruction, a minimization approach is used which alternately optimizes two convex subproblems [38]. These subproblems solve for either the spatial (X) or temporal (T) components, respectively, while the other variable is fixed. The spatial dimensions are vectorized, such that the product  $X * T'$  forms a 2D space-time low-rank matrix that is our estimate of the fMRI time-series, and the 3D image volumes are a re-formatting of the 1D spatial vector. The decomposed matrices X and T form a low-rank decomposition, with the low-rank structure encoded in the dimensionality of the matrices, and X and T are not forced to be orthogonal. Pseudocode is included in Appendix A, and full implementation details are included in Appendix B.

#### 2.1.2 Soft Constrained-Subspace Approaches

The alternating minimization approach allows us to easily add additional subspace-specific constraints into Eq. 1, with the relative balance of low rank and additional constraints controlled by regularization parameters ( $\lambda$ ). The original k-t FASTER approach can be reformulated by setting  $\lambda=0$  in all the following equations. Formulations with non-zero and non-infinity  $\lambda$  will be referred to as softly constrained. Figure 1 contains schematics which demonstrate the various approaches.

#### Tikhonov

The most straightforward constrained-subspace approach derives from methods used for collaborative filtering [39], which often uses Tikhonov regularization on the two component matrices (X and T). L2-regularization terms are included to serve as energy minimization terms for each variable, which prevent matrix entries from becoming too large:

$$X, T = \operatorname{argmin}_{X, T} (\|E(X * T') - d\|_2^2 + \lambda_X \|X\|_2^2 + \lambda_T \|T\|_2^2) \quad (2)$$

#### Low-Resolution Priors

For data acquired using trajectories with non-uniform sampling densities that sample the centre of k-space each TR, one can formulate a L2 regularization corresponding to Low-Resolution Priors (LRP). In uniform radial sampling

178 drawn from multiple spokes (TRs) within a plane, a central window of radius  $\frac{k_{max}}{R}$  fulfils the Nyquist sampling  
 179 criteria in the azimuthal direction. Additionally, these low spatial frequencies represent the net balance of temporal  
 180 processes at the ultimate temporal resolution, but without capturing detailed spatial features. This central window  
 181 can be more strongly weighted during a final reconstruction to accurately capture these high temporal resolution  
 182 processes.

183  
 184 The LRP constraints ( $X_{prior}$  and  $T_{prior}$ ) are created by windowing the full k-space dataset with a Tukey window  
 185 (FWHM:  $\frac{\pi * k_{max}}{2R}$ ) and then reconstructing X and T using Equation 1, albeit with  $d$  referring to windowed k-space  
 186 data, analogous to the estimation of the temporal subspace from training data in the k-t PSF approach. The final  
 187 reconstruction is then weighted by the LRPs along with the full unwindowed sampled data (Equation 3).  
 188

$$189 \quad X, T = \underset{X, T}{\operatorname{argmin}} \left( \|E(X * T') - d\|_2^2 + \lambda_X \|X - X_{prior}\|_2^2 + \lambda_T \|T - T_{prior}\|_2^2 \right) \quad (3)$$

190  
 191 The previously proposed k-t PSF method represents a special case of the more general LRP framework. This method  
 192 reconstructs the spatial coefficients against a temporal basis (or prior) estimated from low-resolution training data.  
 193 k-t PSF can be formulated in the Eq. 3 framework by setting  $\lambda_X = 0$  and  $\lambda_T = \infty$ . The temporal subspace is constrained  
 194 to be identical to this predetermined basis, which is labelled  $T_{prior}$ :  
 195

$$196 \quad X = \underset{X}{\operatorname{argmin}} (\|E(X * T') - d\|_2^2);$$

$$197 \quad T = T_{prior} \quad (4)$$

### 198 **Temporal Subspace Smoothness**

199 The aim of a temporal subspace smoothness term is to preserve the relatively smooth BOLD response (particularly  
 200 at high acceleration) and reduce the magnitude of high temporal frequency under-sampling artefacts. Trajectories  
 201 with a sampling point-spread function that changes every frame (e.g. golden angle radial trajectories) can result in  
 202 high temporal frequency under-sampling artefacts, and so are well suited to this approach. The reconstruction is  
 203 governed by equation 5.  $\nabla$  is a finite difference operator acting on the temporal dimension of each temporal process,  
 204 and  $\lambda_\nabla$  is the corresponding weighting parameter:

$$205 \quad X, T = \underset{X, T}{\operatorname{argmin}} (\|E(X * T') - d\|_2^2 + \lambda_\nabla \|\nabla T\|_2^2) \quad (5)$$

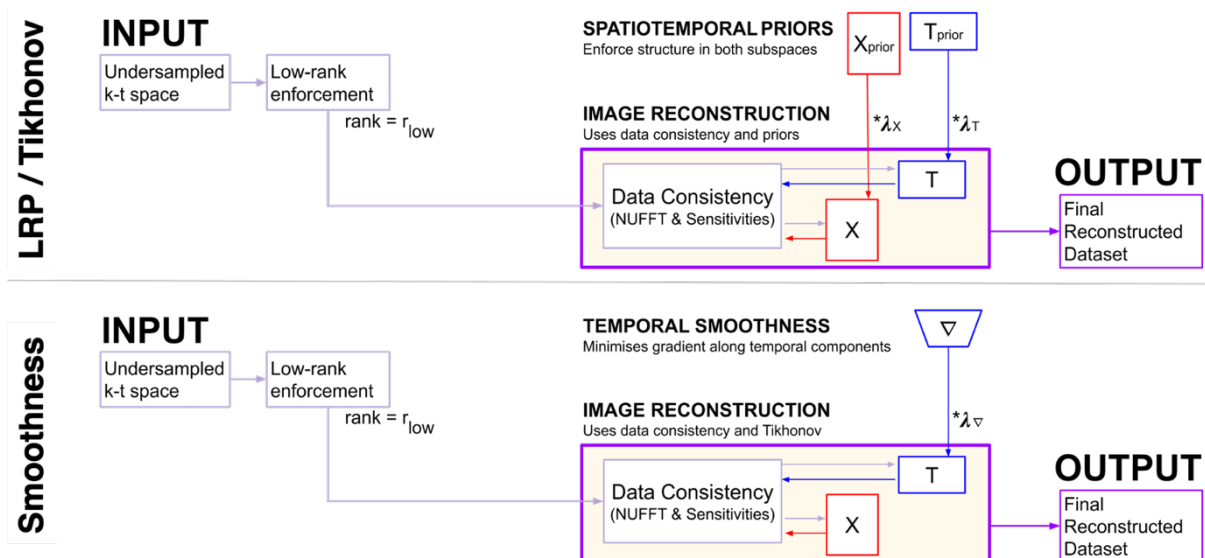

206 **Figure 1:** A schematic overview of a reconstruction with various constrained-subspace approaches. For the LRP,  
207  $X_{\text{prior}}$  and  $T_{\text{prior}}$  are created using a windowed version of the under-sampled data according to only the rank  
208 constraints and coil sensitivity information. For Tikhonov,  $X_{\text{prior}}$  and  $T_{\text{prior}}$  are zero-filled.  $X_{\text{prior}}$  and  $T_{\text{prior}}$  are fed as a  
209 constraint into the final reconstruction, combining with the data consistency term on an unwindowed dataset to  
210 produce the final output. The temporal subspace smoothness schematic shows a finite difference matrix  $\nabla$  applied  
211 solely to the temporal component matrix  $T$ , before also being combined with the data consistency term.  
212

## 213 2.2 Experimental Details

214  
215 We evaluated the different reconstructions (Tikhonov-constrained, LRP-constrained, smoothness-constrained, k-t  
216 FASTER, and k-t PSF) with both retrospectively under-sampled data in various SNR regimes, and with  
217 prospectively under-sampled data. The reconstructions are evaluated based on how accurately the spatial, temporal,  
218 and functional information is captured across a range of acceleration factors.  
219

### 220 2.2.1 Data Acquisition

221  
222 In order to fulfil the non-uniform sampling requirements of the LRP constraints and the changing sampling PSF  
223 requirement of the smoothness constraints, all acquisitions in k-space followed the TURBINE trajectory [36], [40],  
224 a 3D hybrid radial-Cartesian EPI sequence which rotates an EPI blade around the phase encoding axis at constant  
225 azimuthal increments of the Golden Ratio angle ( $\pi/\Phi \approx 111.25^\circ$ ) [41]. This scheme provides a near-uniform radial  
226 sampling of k-space from any arbitrary post-hoc combination of consecutive blades, allowing for flexible degrees of  
227 acceleration (Figure 2) [42]. The under-sampling (or acceleration) factor  $R$  is defined here as the ratio of sampling  
228 lines required to fully sample k-space to the number of sampling lines acquired. In radial sampling,  $R=1$  requires  
229  $\pi/2$  times more lines than Cartesian sampling.

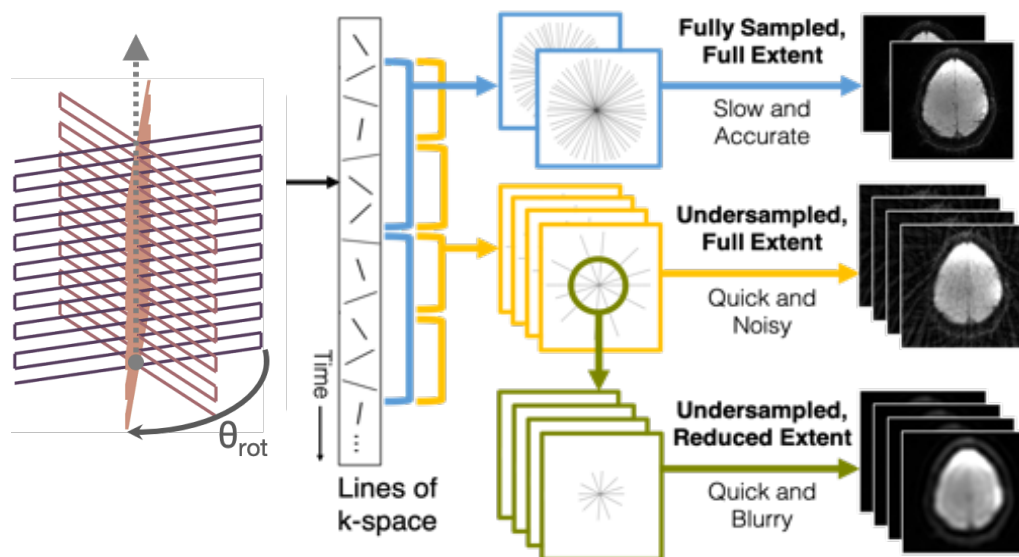

230  
231 **Figure 2:** A demonstration of the flexibility of a golden angle sampling scheme, and of the k-space windowing  
232 required to create LRP constraints. EPI planes (left) is rotated by  $\approx 111.25^\circ$  around the phase-encoding axis. These  
233 rotated planes can then be flexibly combined. If many planes are used (top, blue) then a clean image is easily  
234 generated, but at the cost of temporal resolution. If fewer planes are used (middle, yellow) then more images are  
235 generated per second, but with an increased number of artefacts. The central part of under-sampled k-space  
236 satisfies the Nyquist criterion, even if the full extent of the under-sampled k-space does not. By windowing this  
237 central k-space (green, bottom), an accurate low-resolution depiction of the underlying data can be created.

238

239 All datasets were generated from a 30s/30s on/off finger-tapping task, and recreated 100x100 images with a 2mm  
240 isotropic voxel resolution. An SVD compressed the 32-coil channel to the 8 most dominant components for  
241 speed/memory purposes [43], [44]. All data were acquired on a 3T system (Prisma, Siemens Healthineers, Erlangen  
242 Germany) with informed consent in accordance with local ethics.

243

### 244 **Retrospectively Under-sampled Datasets**

245 “Retrospective dataset A” was created by retrospectively resampling each frame of a fully sampled dataset (300  
246 frames,  $TR_{\text{frame}}=1\text{s}$ ) in k-space with a TURBINE pattern. The original dataset is used as a comparative ground truth,  
247 and was acquired as a full volume through a TURBINE acquisition with 20 blades/frame ( $TR_{\text{blade}}=50\text{ms}$ ,  
248  $TE_{\text{blade}}=30\text{ms}$ ), and a single axial slice with clear bilateral activation was chosen for reconstruction. No rank  
249 reduction was applied to the original data. The dataset was sampled from a magnitude-only ground truth, with no  
250 added noise or phase variation. The retrospective acceleration factors used are  $R=15.71$ ,  $31.42$ ,  $39.27$ , and  $52.36$   
251 (corresponding to 10, 5, 4, and 3 blades/frame respectively).

252

253 “Retrospective dataset B” was created by adding complex Gaussian noise in k-t space to retrospective dataset A at  
254  $R=31.42$ , to highlight the performance difference between the different approaches with additional thermal noise.  
255 Noise was added to form new noisy datasets with high (SNR=100), medium (50) and low (20) SNRs, with the  
256 original dataset considered noiseless for the purposes of comparison. For each SNR, five unique instantiations of the  
257 noise were added to the underlying data before reconstruction. These values are representative of actual fMRI SNR  
258 values [45]. This additional Gaussian noise only models additive thermal noise as a step towards more realistic data  
259 (coherent noise sources such as physiological noise with temporal autocorrelation are not modelled here).

260

### 261 **Prospectively Under-Sampled Data**

262 The prospectively accelerated reconstructions used a TURBINE acquisition across eight different slices centred on  
263 the motor cortex. Slices were first reconstructed by performing an inverse FFT along the phase-encode (z) direction  
264 before a k-t reconstruction was carried out on each (x-y) k-space plane. Identical acquisition parameters with the  
265 same experimental set-up ( $TR_{\text{blade}}=50\text{ms}$ ,  $TE=30\text{ms}$ , flip angle= $15^\circ$ ,  $BW=1786\text{ Hz/px}$ ) were used for a short  
266 experiment (320s, five 30s on/off task epochs) and a long experiment (640s, ten epochs) which were carried out  
267 consecutively on the same subject. An  $R=1.05$  reconstruction of the long dataset contains enough temporal Degrees-  
268 of-Freedom to characterize the underlying functional signal and provide high-quality activation maps, serving as a  
269 fully-sampled approximate “ground truth” reference against which the reconstruction of the accelerated short  
270 dataset is compared. The different acceleration factors in the short prospective dataset ( $R=7.85$ ,  $R=15.71$ ,  $R=26.18$ )  
271 lead to different temporal resolutions and temporal degrees of freedom, as well as affecting other statistical  
272 properties (such as physiological noise variance). While the most general method would reconstruct all eight slices  
273 simultaneously to capture shared temporal processes, the extra computational power required for this was not  
274 considered worth the benefits, and hence slices were reconstructed independently. The reconstruction details are  
275 listed in table 1.

276

| DATASET | BLADES | $TR_{\text{FRAME}}(\text{S})$ | R     | BLADES/FRAME | FRAMES |
|---------|--------|-------------------------------|-------|--------------|--------|
| LONG    | 12,800 | 7.5                           | 1.05  | 150          | 85     |
| SHORT   | 6,400  | 1                             | 7.85  | 20           | 320    |
| SHORT   | 6,400  | 0.5                           | 15.71 | 10           | 640    |
| SHORT   | 6,400  | 0.3                           | 26.18 | 6            | 1066   |

277 **Table 1:** The reconstruction details for the different acceleration factors used in reconstructing the prospectively  
278 under-sampled data.

### 279 280 **2.2.2 Selection of reconstruction parameters**

281 A logarithmic grid search over potential  $\lambda_X$  and  $\lambda_T$  candidates was carried out for all datasets, constraints, and  
282 acceleration factors. The grid search for retrospective dataset A is shown in Figure 3 to demonstrate the typical  
283 effects of varying  $\lambda$  on the reconstructed spatial and temporal information for the different constraints, with  
284 boundary cases shown for  $\lambda=0$  (zero prior influence) and  $\lambda=\infty$  (the solution is fixed to the prior). The special  
285 boundary case of  $(\lambda_X = 0, \lambda_T = 0)$  defines k-t FASTER for all constraints and the special case of  $(\lambda_X = 0, \lambda_T = \infty)$   
286 defines k-t PSF with LRP constraints. As the smoothness constraints rely on a single weighting parameter ( $\lambda_V$ ), the  
287 results are shown as a line graph.

288  
289 The reconstruction rank was fixed at 16 in all cases (a value used in recent literature for low-rank task fMRI [46]),  
290 and a variety of acceleration factors were tested. The convergence criterion was defined as the normalized gradient  
291 for the whole cost function  $CF$  (equation 6), evaluated after the temporal subproblem optimization for iteration  
292 number  $i$ .

$$293 \quad \frac{|CF_i - CF_{i-1}|}{CF_i} < \varepsilon \quad (6)$$

294  
295 A criterion of  $\varepsilon = 10^{-5}$  was used for both retrospective datasets, which was chosen as the value at which a k-t FASTER  
296 reconstruction with different random initializations was found to converge to identical subspaces. For the  
297 prospective dataset,  $\varepsilon = 10^{-3}$  was found to be more optimal. This lower convergence criterion was found to produce  
298 slightly improved statistical parameter maps (defined using the metrics of section 2.2.3), which may be a result of  
299 overfitting occurring at the more precise criterion used in both retrospective datasets. The different criteria chosen  
300 here were selected to ensure a very high level of agreement regardless of the initialization, and was chosen using the  
301 k-t FASTER reconstruction without additional subspace constraints. Future experiments may well benefit from  
302 more liberal criteria to enable faster reconstruction, without necessarily experiencing any loss in reconstruction  
303 quality.

### 304 305 306 **2.2.3 Evaluation and fMRI Analysis**

307 Reconstruction image quality can be difficult to determine [47], with more incoherent ('noise-like') artefacts usually  
308 preferable to coherent artefacts, and the first component of the subspace dominating most image quality metrics  
309 (such as root mean square error or structural similarity index). Spatial artefacts can also make conventional metrics  
310 like SNR (or simple measures of noise) harder to quantify.

311  
312 Instead, the spatial and temporal subspaces were directly compared to the retrospective ground truth subspaces  
313 using canonical correlation analysis. Canonical correlation measures the cosine of the principal angles (the  
314 alignment) between subspaces [48], with higher values reflecting more aligned subspaces, and a value equal to the  
315 rank of the subspace (16 in all cases) demonstrating complete alignment. A Canonical Correlation Score (CCS) was  
316 created by dividing the canonical correlation by the maximal rank of the decomposed matrices, providing a  
317 normalized metric measuring the alignment of the subspaces. X CCS and T CCS respectively refer to the CCS for  
318 spatial and temporal subspace analyses. As a subspace alignment metric, CCS does not account for the magnitude of  
319 the estimated components, only their relative alignment. This potential shortcoming is accepted for two reasons:



320 firstly the data consistency term will generally ensure that the relative magnitude of the signal is well captured, and  
 321 secondly any ICA analysis run on the data will also be scale-independent [49].  
 322

323 For all datasets, task fMRI analysis was performed in FEAT (FSL) [50]. To account for residual autocorrelation, the  
 324 resulting z-statistic maps were null-corrected using mixture modelling [29], and the reconstructed prospective data  
 325 is aligned to the ground truth reference using FLIRT [51] prior to analysis. Receiver Operating Characteristic (ROC)  
 326 curves were calculated to measure the false positive rate (FPR) against true positive rate when comparing the  
 327 reconstructions against the activation map of a fully sampled reconstruction. A threshold of  $z > 3.1$  was used to  
 328 threshold the retrospective truth, and  $z > 4.8$  was used for the prospective data (these values were selected  
 329 heuristically based on anatomical veracity of known regions of expected activation). Z-statistic parameter maps are  
 330 shown at a false positive rate of 0.0015 in order to facilitate visualization. The ROC curves will be focussed on low  
 331 FPRs, as the z-statistic corresponding to high FPRs would never be used in studies. The Area Under the Curve  
 332 (AUC) of the full ROC curve allows for a simple comparison of many reconstructions, but the underlying z-statistic  
 333 maps also provide valuable information as to the spatial location of false positives and false negatives.  
 334

### 335 **3. Results**

336  
 337 Optimal values of  $\lambda_x$ ,  $\lambda_T$ , and  $\lambda_V$  are evaluated for each dataset, method, and acceleration factor, and then the  
 338 optimized reconstructions are evaluated against the reconstructions using the k-t FASTER and k-t PSF methods.  
 339 The optima are selected using a heuristic combination of the CCSs, ROC AUCs, and qualitative assessments of z-  
 340 statistic activation maps.  
 341  
 342

#### 343 **3.1. Retrospective Dataset A Results**

344 The influence of  $\lambda_x$  and  $\lambda_T$  on the recovered temporal and spatial components for different constraints is shown in  
 345 Figure 3. The LRP constraints are defined by a peak in spatial CCS and a broad plateau in temporal CCS (although  
 346 the gradient is quite shallow near the peak). The Tikhonov constraints were defined by a line of peak values normal  
 347 to  $\lambda_x = \lambda_T$ , suggesting a 1D search could suffice to find an optimal  $\lambda$  pairing. For Tikhonov and LRP constraints, the  
 348 upper-left-hand corner of every  $\lambda$  grid represents k-t FASTER, and the far left point represents k-t FASTER in the  
 349 1D plot. The upper-right-hand corner of the LRP constraint  $\lambda$  grids represent k-t PSF. The optimal  $\lambda$  values are  
 350 shown in table 2, and were constant across acceleration factors, except for the highest acceleration factor ( $R=52.36$ ).  
 351  
 352

| R            | Method     | $\lambda_x$ | $\lambda_T$ | $\lambda_V$ | X CCS       | T CCS       | ROC AUC       |
|--------------|------------|-------------|-------------|-------------|-------------|-------------|---------------|
| <b>15.71</b> | Tikhonov   | $10^{-5}$   | $10^{-5}$   | 0           | <b>0.89</b> | <b>0.91</b> | <b>0.9983</b> |
|              | LRP        | $10^{-5}$   | $10^{-5}$   | 0           | <b>0.88</b> | <b>0.91</b> | <b>0.9985</b> |
|              | Smoothness | 0           | 0           | $10^{-5}$   | 0.85        | <b>0.91</b> | <b>0.9983</b> |
|              | k-t FASTER | 0           | 0           | 0           | 0.84        | <b>0.91</b> | <b>0.9983</b> |
|              | k-t PSF    | 0           | $\infty$    | 0           | 0.34        | 0.28        | 0.8956        |
| <b>31.42</b> | Tikhonov   | $10^{-5}$   | $10^{-5}$   | 0           | <b>0.80</b> | <b>0.85</b> | <b>0.9984</b> |
|              | LRP        | $10^{-5}$   | $10^{-5}$   | 0           | 0.78        | 0.82        | <b>0.9984</b> |
|              | Smoothness | 0           | 0           | $10^{-5}$   | 0.74        | <b>0.85</b> | <b>0.9975</b> |
|              | k-t FASTER | 0           | 0           | 0           | 0.73        | <b>0.85</b> | 0.9973        |
|              | k-t PSF    | 0           | $\infty$    | 0           | 0.22        | 0.20        | 0.7052        |

|              |            |           |           |           |             |             |               |
|--------------|------------|-----------|-----------|-----------|-------------|-------------|---------------|
| <b>39.27</b> | Tikhonov   | $10^{-5}$ | $10^{-5}$ | 0         | <b>0.76</b> | <b>0.83</b> | <b>0.9974</b> |
|              | LRP        | $10^{-5}$ | $10^{-5}$ | 0         | 0.72        | 0.78        | <b>0.9968</b> |
|              | Smoothness | 0         | 0         | $10^{-5}$ | 0.71        | <b>0.84</b> | 0.9956        |
|              | k-t FASTER | 0         | 0         | 0         | 0.70        | <b>0.84</b> | 0.9956        |
|              | k-t PSF    | 0         | $\infty$  | 0         | 0.21        | 0.22        | 0.5213        |
| <b>52.36</b> | Tikhonov   | $10^{-5}$ | $10^{-5}$ | 0         | <b>0.73</b> | <b>0.82</b> | <b>0.9967</b> |
|              | LRP        | $10^{-4}$ | $10^{-6}$ | 0         | 0.67        | 0.78        | <b>0.9962</b> |
|              | Smoothness | 0         | 0         | $10^{-4}$ | 0.65        | 0.80        | 0.9938        |
|              | k-t FASTER | 0         | 0         | 0         | 0.63        | <b>0.81</b> | 0.9927        |
|              | k-t PSF    | 0         | $\infty$  | 0         | 0.21        | 0.23        | 0.5741        |

353

354

**Table 2:** The optimal  $\lambda$  values for each method in retrospective dataset A. Results within 0.001 of the best ROC AUC score and 0.01 of the best CCS values are shown in bold.

355

356

357

Z-statistic activation maps were derived for all approaches using the optimized  $\lambda$  values at  $R=31.42$  (Figure 4) and  $R = 52.36$  (Figure 5). The ROC curves and activation maps are consistent with the results of Figure 3, with the Tikhonov and LRP constraints performing better than the other k-t methods at both acceleration factors, albeit with the Tikhonov regularization marginally outperforming LRP-constrained reconstruction at  $R=52.6$ . The cleanness of the dataset appeared to allow very high reconstruction factors which were not found to be possible in more realistic data.

358

359

360

361

362

363

## a) Tikhonov-Constrained Reconstruction

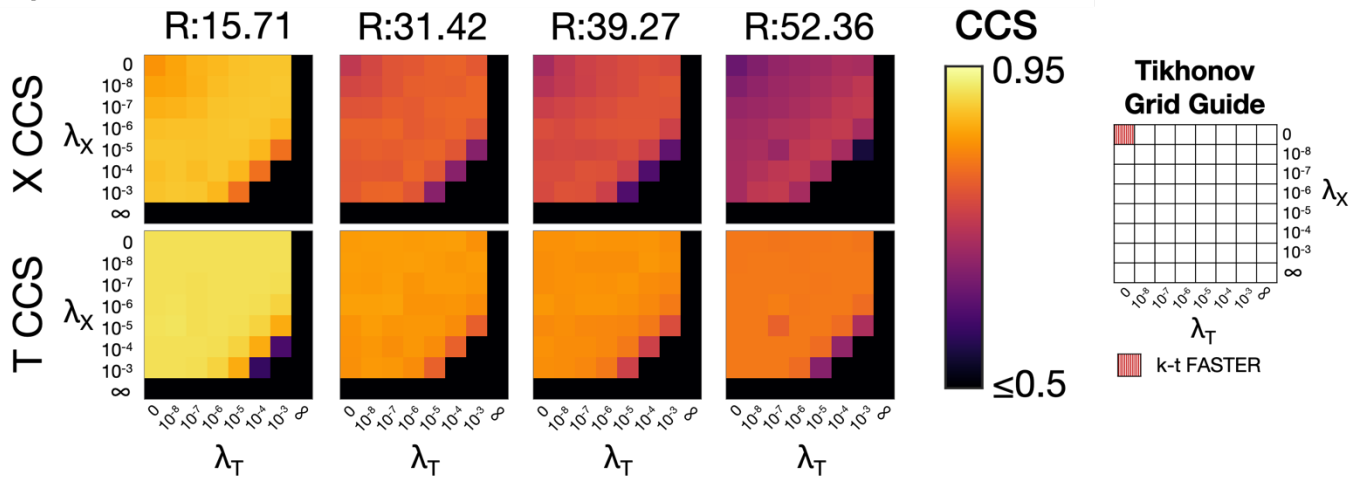

## b) LRP-Constrained Reconstruction

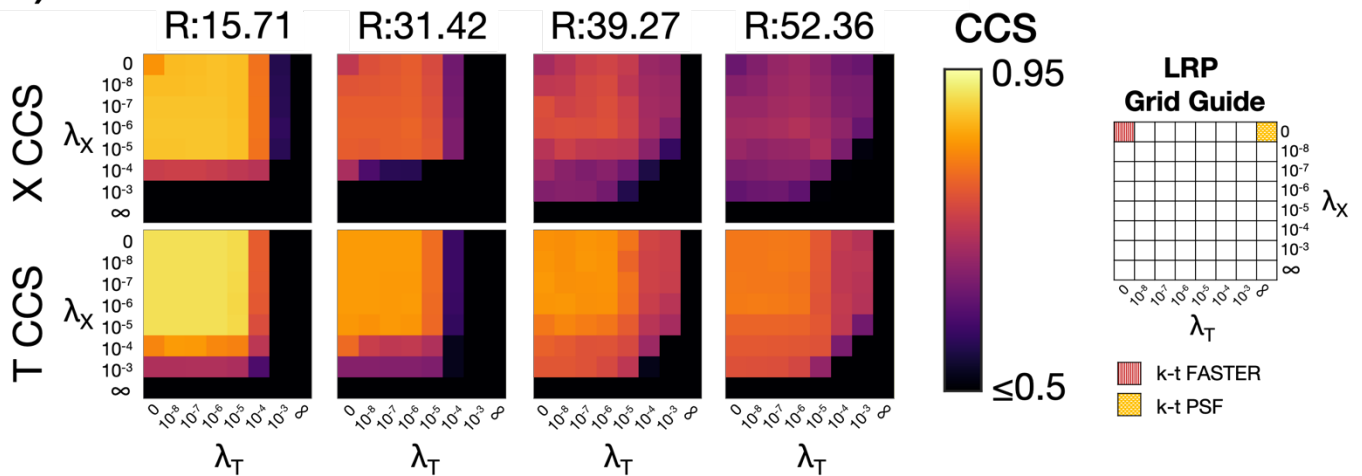

## c) Temporal Subspace Smoothness

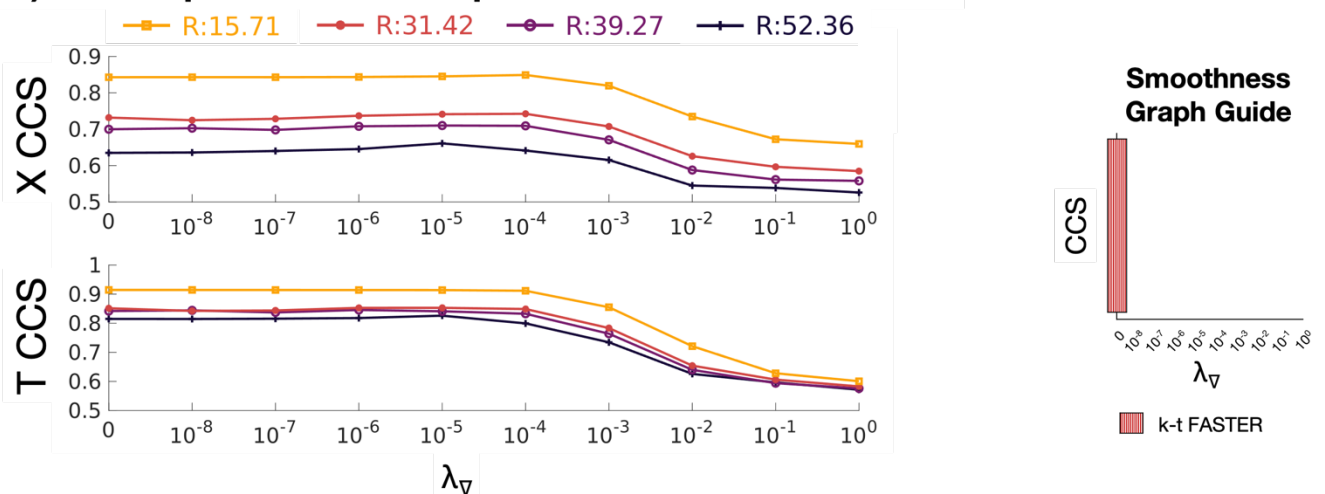

364

365

366

367

368

369

370

371

**Figure 3:** The canonical correlation scores (CCS) of retrospective dataset A vs a ground truth for a): Tikhonov-constrained reconstructions, b): LRP-constrained reconstructions, c): Temporal Subspace Smoothness reconstructions. X CCS and T CCS refer to the spatial and temporal Canonical Correlation Scores respectively. The acceleration factors shown are: R=15.71 (10 blades/frame), R=31.42 (5 blades/frame), R=39.27 (4 blades/frame), and R=52.36 (3 blades/frame). The  $\lambda$  values encoding the pre-existing k-t FASTER and k-t PSF methods are shown on the right for each constraint.

R:31.42

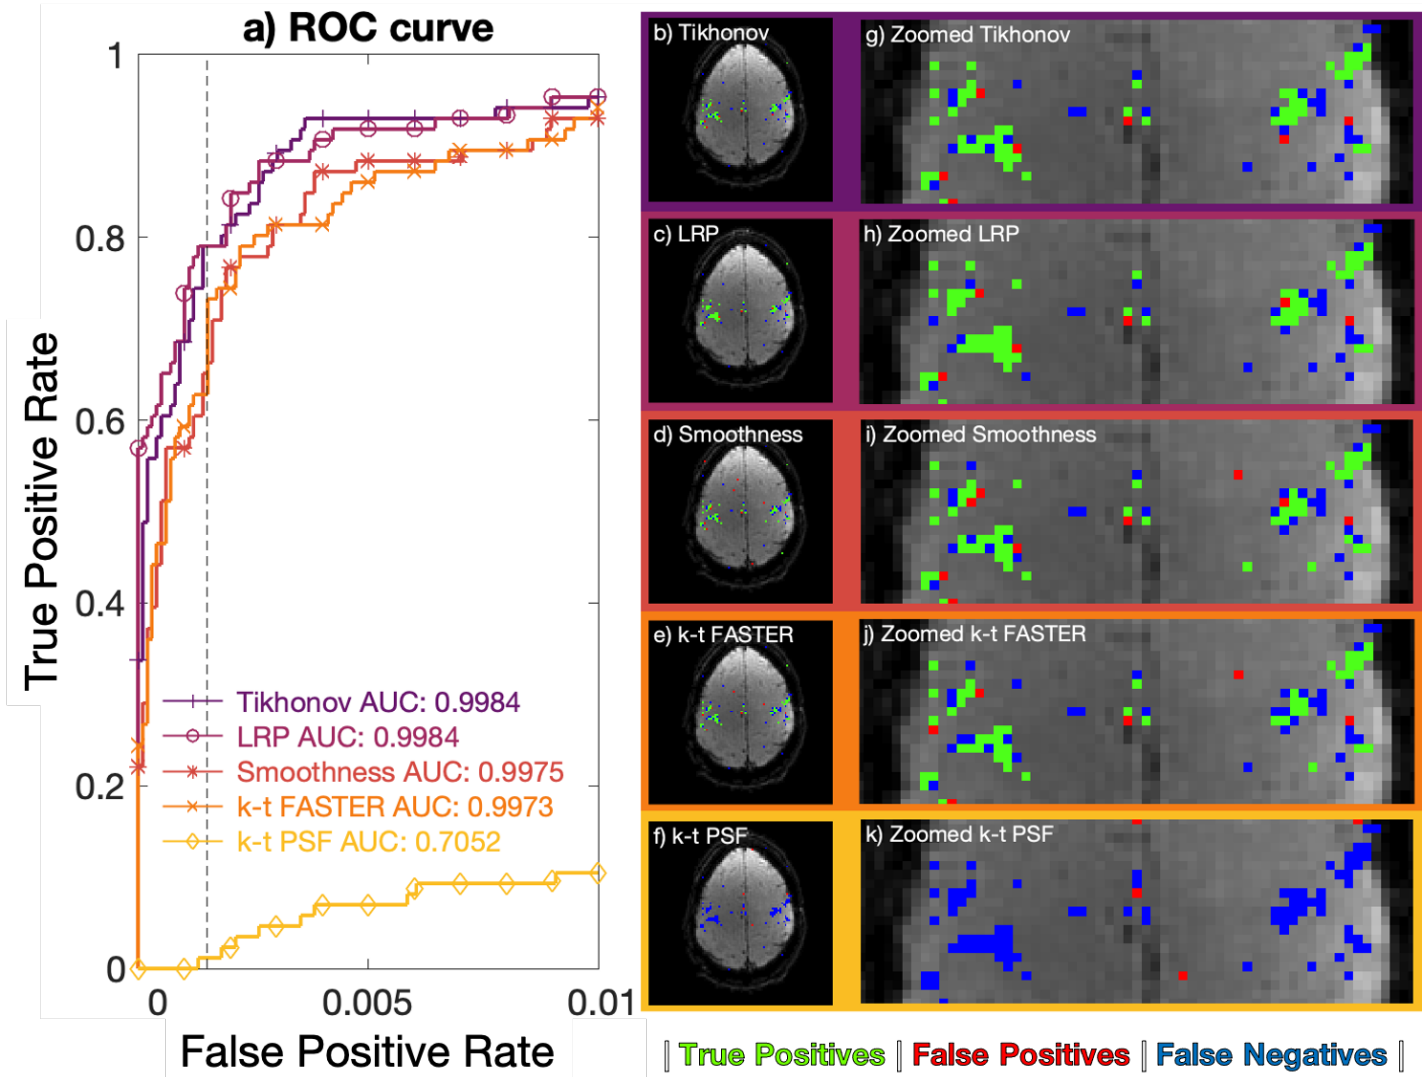

372

373

374

375

376

377

**Figure 4:** R=31.42 (5 blades/frame) retrospective dataset A reconstructions. a) ROC curves, legend lists full curve AUC. b)-f) Activation maps using a z-statistic corresponding to an FPR of 0.15%. g)-k) A medial zoom of the associated activation maps. b/g) Tikhonov:  $\lambda_x = 10^{-5}$ ,  $\lambda_T = 10^{-5}$ , c/h) LRP:  $\lambda_x = 10^{-5}$ ,  $\lambda_T = 10^{-5}$ , d/i) Temporal subspace smoothness:  $\lambda_V = 10^{-5}$ , e/j) k-t FASTER, f/k) k-t PSF. Maps b)-k) use green true positive pixels, red false positives, and blue false negatives.

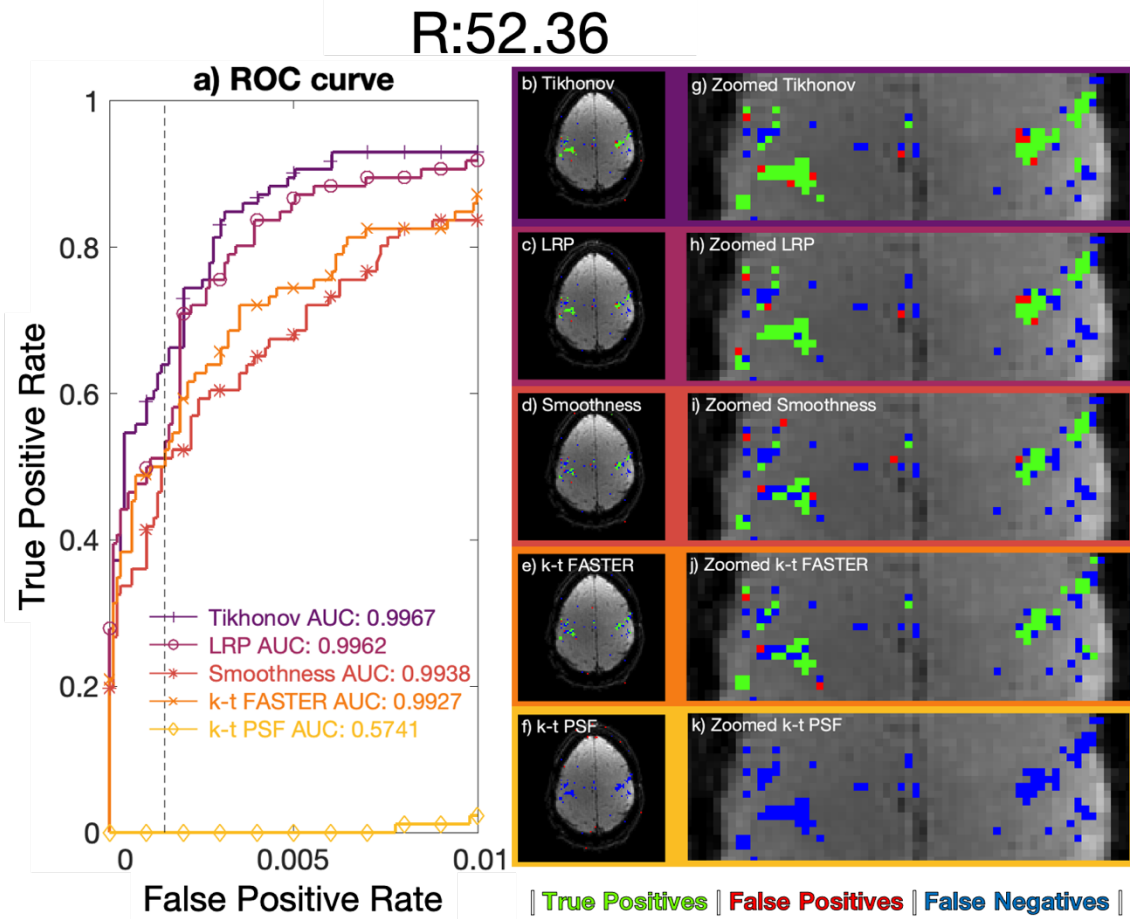

378

379 **Figure 5:** R=52.6 (3 blades/frame) retrospective dataset A reconstructions. a) ROC curves, legend lists full curve  
 380 AUC. b)-f) Activation maps using a z-statistic corresponding to an FPR of 0.15%. g)-k) A medial zoom of the  
 381 associated activation maps. b/g) Tikhonov:  $\lambda_X = 10^{-5}$ ,  $\lambda_T = 10^{-5}$ , c/h) LRP:  $\lambda_X = 10^{-4}$ ,  $\lambda_T = 10^{-6}$ , d/i) Temporal subspace  
 382 smoothness:  $\lambda_V = 10^{-4}$ , e/j) k-t FASTER, f/k) k-t PSF. Maps b)-k) use green true positive pixels, red false positives,  
 383 and blue false negatives.

384

385

### 3.2 Retrospective Dataset B Results

386

Optimal  $\lambda$  was found to increase as SNR decreased for Tikhonov and LRP results. The following values were used for  
 387 both Tikhonov and LRP constraints: high SNR (SNR=100,  $\lambda_X=10^{-4}$ ,  $\lambda_T=10^{-5}$ ); medium SNR (SNR=50,  $\lambda_X=10^{-4}$ ,  
 388  $\lambda_T=10^{-4}$ ); low SNR (SNR=20,  $\lambda_X=10^{-3}$ ,  $\lambda_T=10^{-4}$ ). The temporal subspace smoothness results used  $\lambda_V = 10^{-4}$  in all  
 389 cases, although the variation in results was small for  $10^{-4} < \lambda_V < 10^{-1}$ .

390

391 The mean AUC of the noisy parameter map ROCs compared to a noiseless truth are summarized in Figure 6, with  
 392 all reconstructions losing fidelity as SNR decreased. The noiseless reconstructions are equivalent to the data shown  
 393 in figure 4. Maps comparing thresholded z-stat maps with the ground truth for each method are shown in Figure 7,  
 394 with full visualizations of all reconstruction activation maps and ROC curves shown in Supplementary Figures 4-6.  
 395 In t-tests performed between the different constraints within the three non-noiseless SNRs, all reconstructions  
 396 within an acceleration factor were significantly different ( $p < 0.05$ ) except Tikhonov vs LRP at high SNR, k-t FASTER  
 397 vs k-t PSF at low SNR, and LRP vs Smoothness at low SNR.

398

399 Tikhonov-constrained reconstruction outperformed all other methods, identifying plausible activity even at the  
 400 lowest SNR tested. LRP and temporal smoothness constraints represent improvements on the previously proposed  
 401 techniques (k-t FASTER and PSF), with all constrained results better than all k-t FASTER results at medium and  
 402 low SNR. The k-t FASTER approach appears highly susceptible to noise, with a roughly equivalent noiseless AUC  
 403 score to the other methods at  $R=31.42$  (figure 5) rapidly decreasing as SNR decreased. The k-t PSF approach failed  
 404 to capture activation even for the noiseless simulated dataset at this acceleration factor.

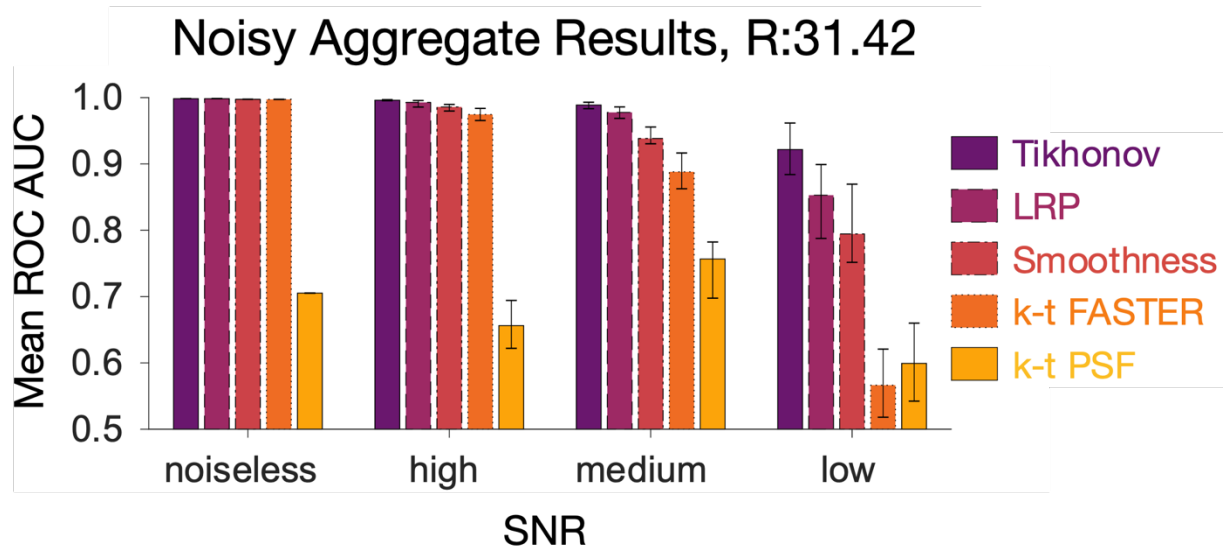

405 **Figure 6:** Retrospective dataset B reconstruction AUC results. Each bar represents the mean AUC of five different  
 406 instantiations of Gaussian noise in k-t space at a specific SNR for a specific reconstruction method, except for the  
 407 left-hand set, which represent a single noiseless reconstruction. The error bars show the range of AUC values.

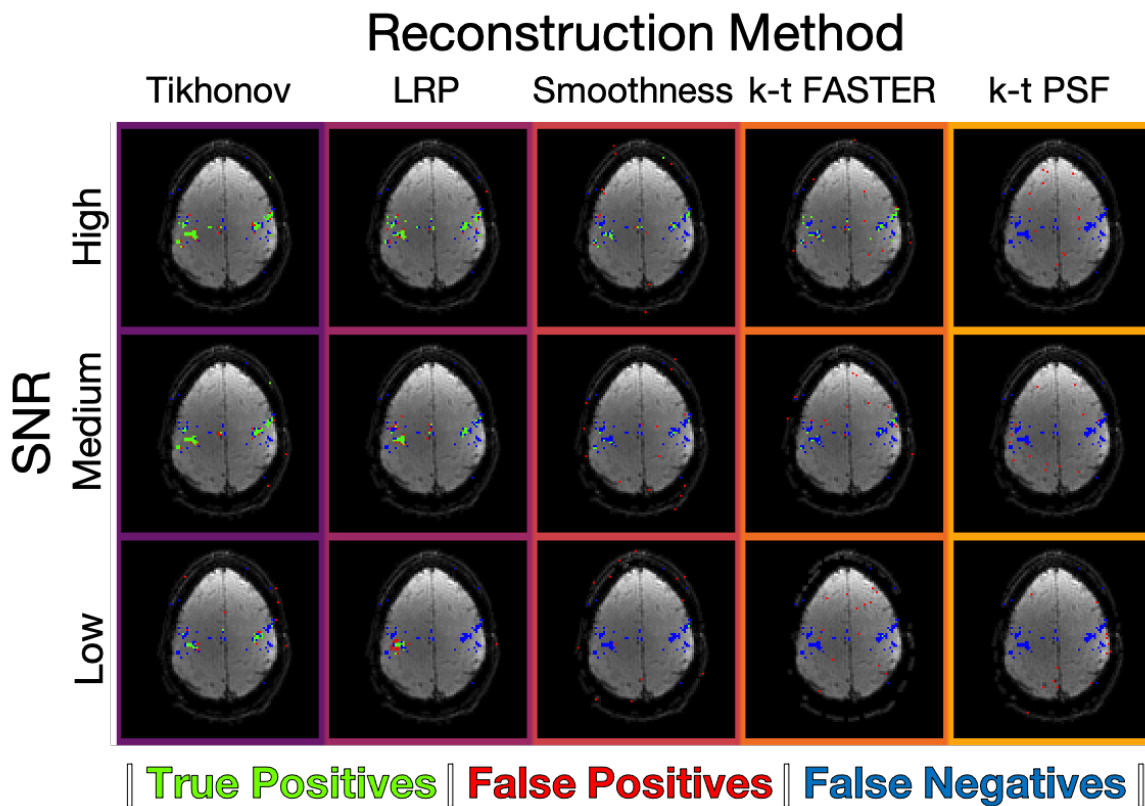

408 **Figure 7:** An example activation map at each noise value for each reconstruction method. See Supplementary  
 409 Figures 3-5 for the full set of activation maps and the individual ROC curves. As with Figures 4-5, green pixels  
 410 represent true positives, red pixels represent false positives, blue pixels represent false negatives. The z-statistics  
 411 threshold yielded a false positive rate of 0.15%.  
 412

### 413 3.3 Prospective Results

414 This section presents results on the prospectively under-sampled (“real”) experiments, with three different  
 415 acceleration factors tested: R=26.2 (6 blades/frame); R=15.7 (10 blades/frame); and R=7.9 (20 blades/frame). The  
 416 optimal  $\lambda$  values were found to be dependent on both R and the chosen constraint in the prospective dataset (the  
 417 distribution of reconstruction scores with respect to  $\lambda$  were similar to Figure 3, and so are not shown here). The only  
 418 exception is that the LRPs were less dependent on  $\lambda_T$ , with a broader range of values producing scores close to the  
 419 optimum. Optimal  $\lambda$  values are shown in table 3.

420

| R            | <i>Blades<br/>Frames</i> | Method     | $\lambda_x$ | $\lambda_T$ | $\lambda_V$ | MEAN RECON TIME<br>(HOURS) | ROC AUC       |
|--------------|--------------------------|------------|-------------|-------------|-------------|----------------------------|---------------|
| <b>7.85</b>  | 20                       | Tikhonov   | $10^{-1}$   | $10^{-2}$   | 0           | 2.9                        | <b>0.9915</b> |
|              |                          | LRP        | $10^{-1}$   | $10^{-7}$   | 0           | (1.7+1.6) 3.3              | <b>0.9913</b> |
|              |                          | Smoothness | 0           | 0           | $10^{-3}$   | <b>1.4</b>                 | <b>0.9911</b> |
|              |                          | k-t FASTER | 0           | 0           | 0           | <b>1.4</b>                 | <b>0.9906</b> |
|              |                          | k-t PSF    | 0           | $\infty$    | 0           | (1.7+0.3) 2.0              | 0.9884        |
| <b>15.71</b> | 10                       | Tikhonov   | $10^{-1}$   | $10^{-2}$   | 0           | 6.3                        | <b>0.9871</b> |
|              |                          | LRP        | $10^{-1}$   | $10^{-3}$   | 0           | (26.9+6.4) 33.3            | 0.9851        |
|              |                          | Smoothness | 0           | 0           | $10^{+1}$   | 11.2                       | <b>0.9880</b> |
|              |                          | k-t FASTER | 0           | 0           | 0           | <b>5.8</b>                 | 0.9644        |
|              |                          | k-t PSF    | 0           | $\infty$    | 0           | (26.9+0.3) 27.2            | 0.9000        |
| <b>26.18</b> | 6                        | Tikhonov   | $10^{-2}$   | $10^{-1}$   | 0           | <b>11.6</b>                | 0.9785        |
|              |                          | LRP        | $10^{-3}$   | $10^{-7}$   | 0           | (192.3+11.3) 203.6         | 0.9586        |
|              |                          | Smoothness | 0           | 0           | $10^{+2}$   | 29.6                       | <b>0.9875</b> |
|              |                          | k-t FASTER | 0           | 0           | 0           | 13.0                       | 0.9410        |
|              |                          | k-t PSF    | 0           | $\infty$    | 0           | (192.3+0.3) 192.6          | 0.4613        |

421 **Table 3:** the optimum  $\lambda$  values in the prospective dataset for each constraint at each acceleration factor. The time in  
 422 brackets shows the split between the time taken to generate the priors and the final reconstruction. Results with the  
 423 shortest reconstruction time or within 0.001 of the best ROC AUC score are shown in bold.

424

425 The ROC curves for the optimal  $\lambda$  at each acceleration factor for each method are shown in Figure 8. The activation  
 426 maps for every second slice of the R=15.7 and R=26.2 results are shown in Figures 9 and 10 respectively. The full  
 427 selection of activation maps for all slices and acceleration factors can be seen in Supplementary Figures 6-8.

428

429 At the lower acceleration factor (R=7.85), all approaches appear approximately equivalent, with k-t PSF performing  
 430 worst with AUC = 0.9884 and all other methods having AUC > 0.99. At the medium acceleration factors (R=15.71,  
 431 Figure 9), the soft subspace constraints outperformed k-t FASTER (AUC = 0.9644) and k-t PSF (AUC = 0.90) with  
 432 AUC > 0.98. At the high acceleration factor (R=26.18, Figure 10), the Tikhonov-constrained results and smoothness  
 433 results outperformed all other methods with AUCs of 0.9785 and 0.9875 respectively, and the LRP constrained  
 434 method (AUC = 0.9586) performing similar to k-t FASTER (AUC = 0.9410) at this acceleration factor. Here, the  
 435 smoothness constraints outperformed the Tikhonov constraints by a score of 0.09, whereas the Tikhonov  
 436 constraints either performed equivalently or outperformed the smoothness constraints in all other scenarios.

437

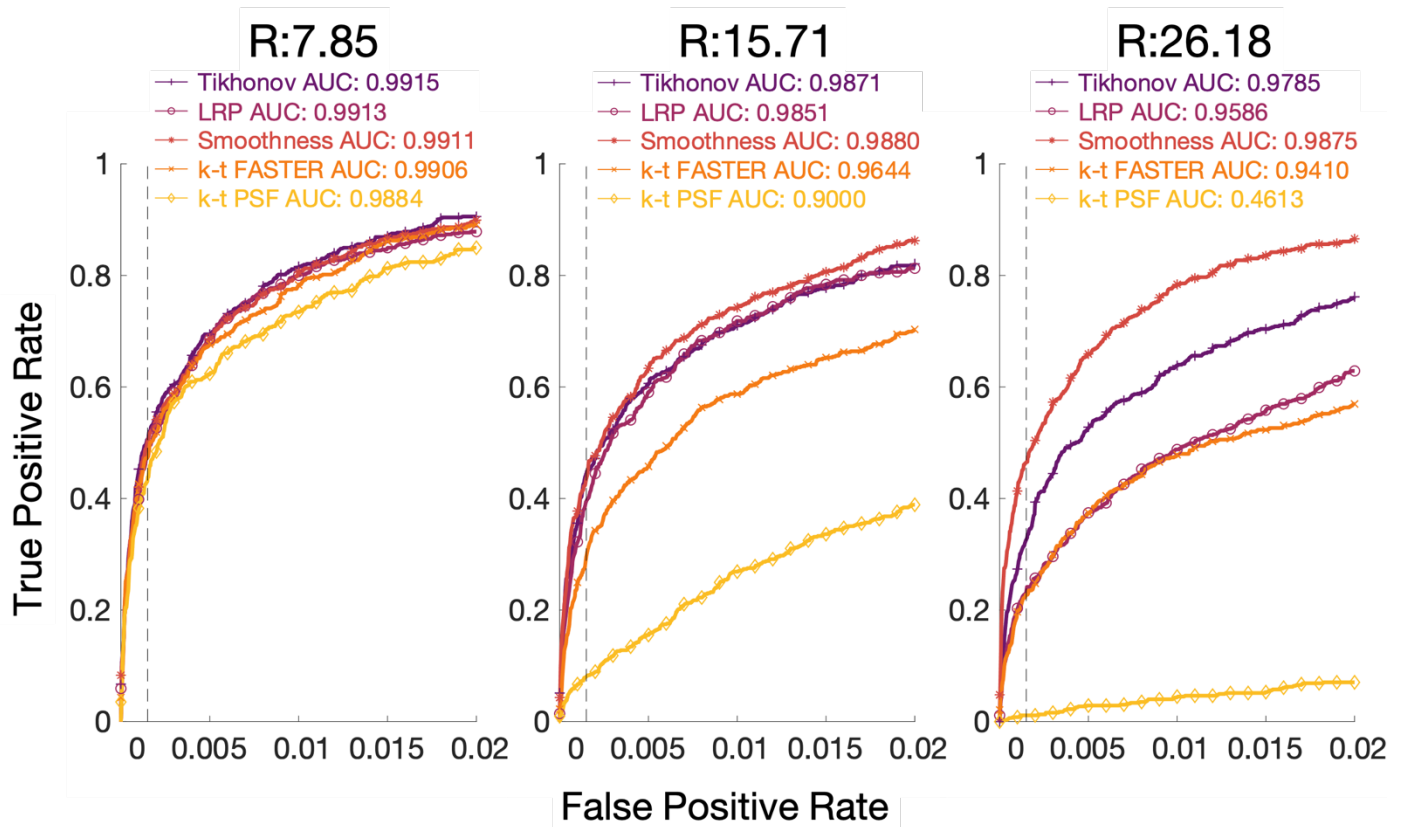

438

439

**Figure 8:** The ROC curves across eight slices for a)  $R=7.85$  (20 blades/frame), b)  $R=15.71$  (10 blades/frame), and c)  $R=26.18$  (6 blades/frame). The ground truth is the long dataset taken under similar experimental conditions, at a threshold of  $z \geq 4.8$ . The false-positive rate is shown on the x-axis up to 0.02, in order to allow visualization of the analytically relevant representation of the activation maps.

440

441

442

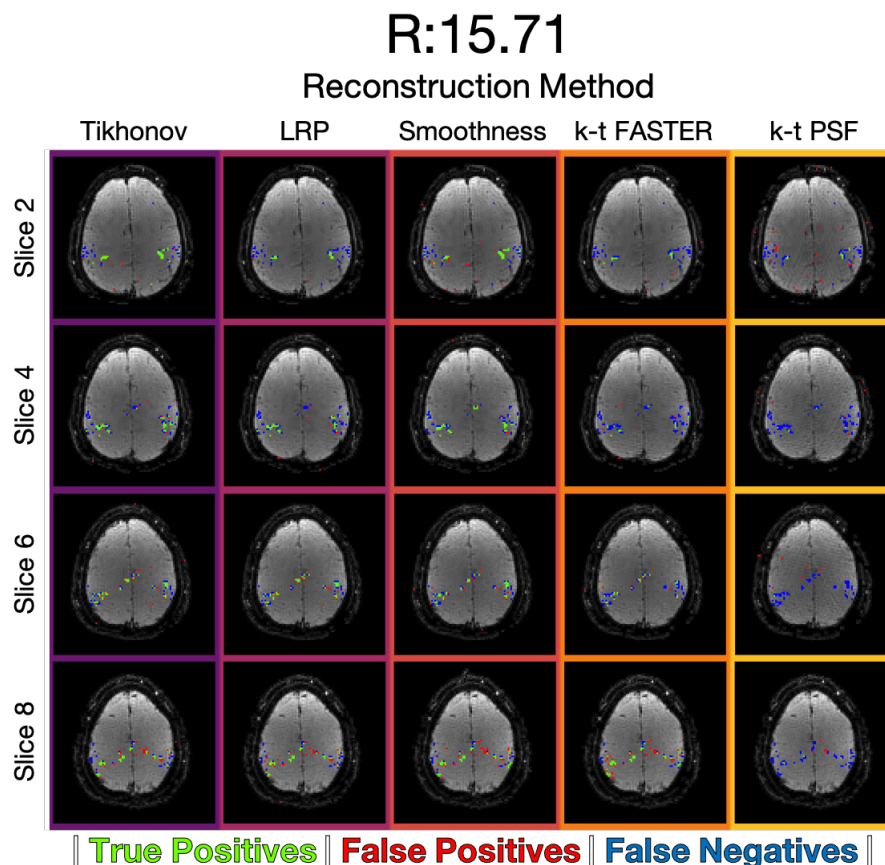

443

**Figure 9:** Prospective data,  $R=15.71$ . The activation maps for every second slice of the reconstruction, at a threshold defined by a 0.15% volumetric false positive rate. Supplementary Figure 7 shows the activation maps of all slices.

444

445



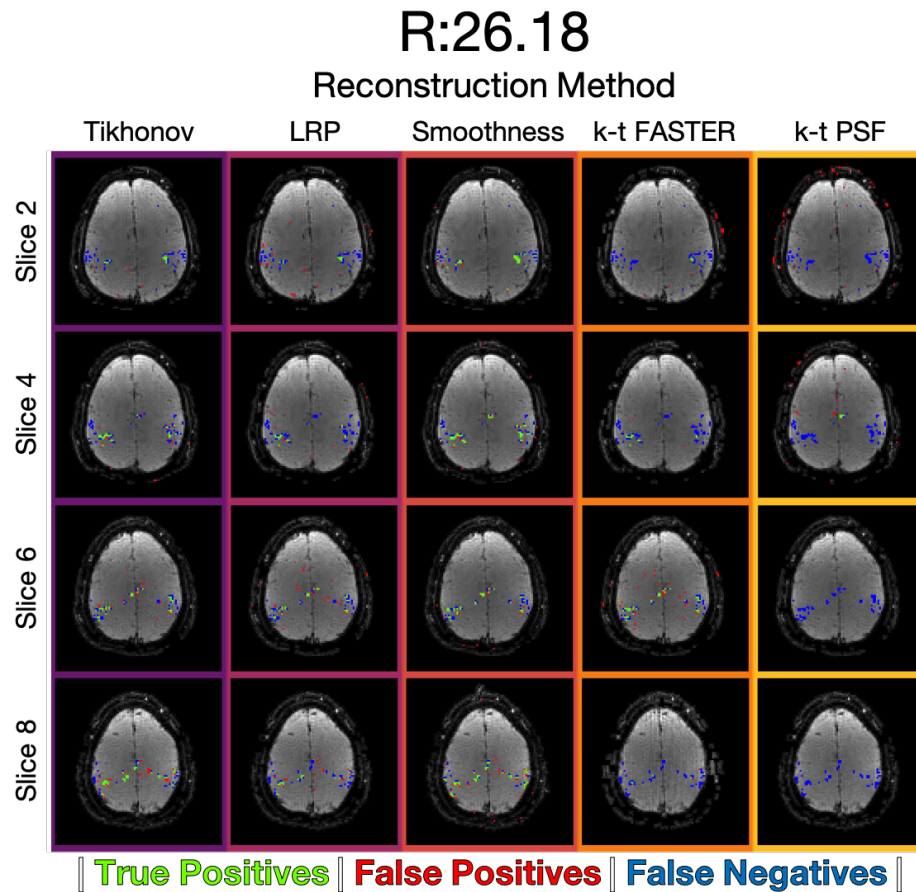

446

447

**Figure 10:** Prospective data,  $R=26.18$ . The activation maps for every second slice of the reconstruction, at a threshold defined by a 0.15% volumetric false positive rate. Supplementary Figure 8 shows the activation maps of all slices.

448

449

450

451

#### 4. Discussion

452

453

This study demonstrates the impact of three different  $L_2$ -based constraints in a global low-rank optimization framework for accelerated fMRI data reconstruction. In instances of high acceleration or low SNR, the constrained approaches are able to better identify true regions of activation in a finger-tapping study, as well as producing solutions which more closely map to the spatial and temporal subspaces of a ground truth. These results highlight the viability of non-linear reconstruction frameworks in fMRI that do not rely explicitly on sparse modelling of the BOLD signals.

454

455

456

457

458

459

460

##### 4.1 Comparison between methods

461

Across the different evaluated datasets a clear trend emerged: the addition of soft subspace-constraints to the k-t FASTER formulation produces improved subspace alignment and ROC AUC scores at high acceleration/low SNR. Collectively, the qualitative and quantitative metrics reveal that very high acceleration factors are possible with these soft constrained-subspace low-rank approaches, in the right conditions. The conditions tested in this paper show that the fMRI signal of interest can be represented by a small number of high-variance components, as elicited with a finger-tapping motor task experiment. The effectiveness of this approach in other, lower-variance examples such as resting-state fMRI or more subtle task fMRI experiments remains to be seen.

462

463

464

465

The non-linear reconstruction framework only aimed to recover the first 16 components in a low-rank representation of the signal, resulting in feasible reconstructions at very high acceleration due to the reduced matrix

466

467

468

469

470

471 degrees of freedom in the estimated output. The acceleration factors reported here ( $R=26.18$  for the prospective  
472 dataset) are considerably higher than those reported in previous studies of low-rank fMRI reconstruction using  
473 realistic data, which is facilitated largely by the additional soft subspace-constraints. The high acceleration factors in  
474 the retrospective dataset A (e.g.  $R=52.36$ ) were chosen to differentiate between different constraints, and are not  
475 considered representative of realistic acceleration factors.

476  
477 The Tikhonov constraints produced high fidelity reconstructions in both retrospective and prospective under-  
478 sampling, even at acceleration factors or SNR levels where other methods began to fail (e.g. the prospective  
479  $R=26.18/TR=0.3s$  results, or the low SNR retrospective dataset B results). Additionally, Tikhonov-constrained  
480 reconstructions were the fastest to reconstruct out of all the softly constrained reconstructions while its optimal  $\lambda$   
481 pairing could be found through a 1-D parameter search only - reducing the dimensionality of the design constraints.

482  
483 However, the Tikhonov reconstructions were outperformed by the temporal subspace smoothness approach in the  
484 reconstructions of the prospectively under-sampled data, despite that same smoothness approach only providing a  
485 relatively small improvement over k-t FASTER in both retrospective datasets. However, the retrospective datasets  
486 were constructed under conditions that were favourable for k-t FASTER, without any additional phase modulations  
487 or physiological noise (beyond what was in the original dataset). The scale of improvement is also worth noting,  
488 with the AUC scores showing Tikhonov outperforming smoothness by an absolute value of +0.3% in the most  
489 discriminatory result of retrospective dataset A ( $R=52.36$ , 0.9967 vs 0.9938), but smoothness outperforming  
490 Tikhonov by +0.9% in the highest acceleration factor tested in the prospective data ( $R=26.18$ , 0.9875 vs 0.9785).  
491 This smoothness improvement is in addition to the improvement the Tikhonov approach manages over all other  
492 methods (+3.75% total over k-t FASTER), while also occurring in the dataset most representative of real data. The  
493 outstanding question from these findings is then whether all real-data reconstructions favour smoothing  
494 constraints, or are there a set of conditions in real data that would favour Tikhonov constraints?

495  
496 The low-resolution priors were unable to match the performance of the Tikhonov constraints in any dataset, nor the  
497 temporal smoothness in the prospective dataset. The false positives in the LRP-constrained z-stat maps were  
498 localized close to the area of interest, indicating the influence of the prior and resulting potential reduction in  
499 effective spatial resolution. By comparison, at lower SNR k-t FASTER produced false positives which were less  
500 localized to voxels adjacent to true positive activations. As a generalization of the k-t PSF approach, this may reflect  
501 the intrinsic limitation of generating priors from low-resolution training data for constraining a high-resolution  
502 reconstruction. Furthermore, reconstruction times for the LRP constrained reconstructions were the longest by far.

503  
504 The k-t PSF method did well at  $R=7.85$  in the real prospective data, and has not to our knowledge been previously  
505 tested without sparsity constraints in an fMRI framework. However, the formulation of k-t PSF used in this paper  
506 did not produce robust solutions in the other datasets or at the higher acceleration factors tested. This is also  
507 consistent with the performance of the low-resolution prior method, where both methods that constrained the  
508 reconstruction based on a low-spatial resolution temporal basis were not as successful as the other constraints in  
509 under-sampled signal recovery.

510  
511 The optimal regularization factors varied between datasets, and were dependent on SNR for Tikhonov/LRP  
512 constraints, and weakly with  $R$ . It is clear that a soft constraint can help guide the dataset to improved  
513 reconstruction scores, but as with many regularization methods, identification of optimal  $\lambda$  parameters will require  
514 some care.

515

## 516 **4.2 Limitations and Future Work**

517 One limitation of this work is the small sample of datasets used to evaluate the methods, and further testing on  
518 additional datasets with physiological noise models or other confounding factors would be needed to establish  
519 robustness. This would allow more insight into the robustness of the Tikhonov and smoothness constraints, the  
520 optimal  $\lambda$  values, and the impact of coherent noise contamination or auto-regressive noise properties on the  
521 different approaches. In addition, further dataset testing could assess the impact of motion. Motion can violate the  
522 low-rank assumptions in fMRI, with motion-related variance swamping BOLD fluctuations, and so adequate  
523 motion-correction is required. However, a major challenge is that this effect cannot be corrected post-hoc using  
524 conventional time-series registration, but needs to correct the k-space data prior to low-rank reconstruction. The  
525 data collected for this study was performed on healthy volunteers with very little apparent motion, although the  
526 TURBINE k-space trajectory enables motion correction using low spatial resolution navigators [36]. One solution  
527 could involve combining TURBINE's self-navigation capabilities with a joint estimation of the subspaces and  
528 motion parameters, leveraging an assumption that a motion-free reconstruction would have the lowest rank or  
529 nuclear norm. While the TURBINE acquisition scheme was used to help fulfil the non-uniform sampling density  
530 requirement of the LRP constraints, alternative sampling schemes could also be tested to explore how well the  
531 smoothness and Tikhonov constraints generalize.

532  
533 The joint-optimization of two subspaces in alternating minimization provides a flexible reconstruction framework,  
534 but could benefit from speeding up. The slowest reconstructions took up to 10s of hours per slice for both Tikhonov  
535 and smoothness- constrained reconstruction (Table 2). While Toeplitz Embedding was used to speed up iterative  
536 use of the NUFFT [52], [53], the reconstruction code has not been optimized for speed and these computation times  
537 could likely be reduced significantly. In addition to code optimization, subproblem parameters such as the  
538 convergence factor  $\epsilon$  and the number of internal iterations in each linear subproblem (see Supplementary Figure 2)  
539 were both chosen to be deliberately conservative for this exploratory analysis and could be fine-tuned for faster  
540 reconstructions in future.

## 541 542 **5. Conclusions**

543 Low-rank reconstructions in fMRI can benefit from additional regularization, particularly at high acceleration  
544 factors or in low-SNR regimes. The L2-based constrained-subspace approaches studied here were shown to improve  
545 upon methods like k-t FASTER in realistic fMRI data at acceleration factors of  $R > 10$ , although there is an associated  
546 increase in reconstruction time as currently implemented. The improvements with the soft subspace constraints  
547 were most apparent at the highest acceleration factor tested ( $R=26$ ,  $TR=0.3$ ), and particularly pronounced for the  
548 Tikhonov constraints and temporal smoothness constraints.

## 549 550 **Bibliography**

- 551 [1] K. P. Pruessmann, M. Weiger, M. B. Scheidegger, and P. Boesiger, "SENSE: Sensitivity encoding  
552 for fast MRI," *Magn. Reson. Med.*, vol. 42, no. 5, pp. 952–962, 1999.
- 553 [2] M. A. Griswold *et al.*, "Generalized Autocalibrating Partially Parallel Acquisitions (GRAPPA),"  
554 *Magn. Reson. Med.*, vol. 47, no. 6, pp. 1202–1210, 2002.
- 555 [3] K. Setsompop, B. A. Gagoski, J. R. Polimeni, T. Witzel, V. J. Wedeen, and L. L. Wald, "Blipped-  
556 controlled aliasing in parallel imaging for simultaneous multislice echo planar imaging with  
557 reduced g-factor penalty," *Magn. Reson. Med.*, vol. 67, no. 5, pp. 1210–1224, 2012.
- 558 [4] M. Barth, F. A. Breuer, P. J. Koopmans, D. G. Norris, and B. A. Poser, "Simultaneous multislice  
559 (SMS) imaging techniques," *Magn. Reson. Med.*, vol. 75, no. 1, pp. 63–81, 2016.

- 560 [5] B. Madore, G. H. Glover, and N. J. Pelc, “Unaliasing by Fourier-encoding the overlaps using the  
561 temporal dimension (UNFOLD), applied to cardiac imaging and fMRI,” *Magn. Reson. Med.*, vol.  
562 42, no. 5, pp. 813–828, Nov. 1999.
- 563 [6] J. Tsao, P. Boesiger, and K. P. Pruessmann, “k-t BLAST and k-t SENSE: Dynamic MRI with high  
564 frame rate exploiting spatiotemporal correlations,” *Magn. Reson. Med.*, vol. 50, no. 5, pp. 1031–  
565 1042, Nov. 2003.
- 566 [7] F. Huang, J. Akao, S. Vijayakumar, G. R. Duensing, and M. Limkeman, “K-t GRAPPA: A k-space  
567 implementation for dynamic MRI with high reduction factor,” *Magn. Reson. Med.*, vol. 54, no. 5,  
568 pp. 1172–1184, 2005.
- 569 [8] S. D. Yun, M. Reske, K. Vahedipour, T. Warbrick, and N. J. Shah, “Parallel imaging acceleration  
570 of EPIK for reduced image distortions in fMRI,” *Neuroimage*, vol. 73, pp. 135–143, 2013.
- 571 [9] M. Lustig, D. L. Donoho, and J. M. Pauly, “Sparse MRI: The application of compressed sensing for  
572 rapid MR imaging,” *Magn. Reson. Med.*, vol. 58, no. 6, pp. 1182–1195, 2007.
- 573 [10] D. J. Holland *et al.*, “Compressed sensing reconstruction improves sensitivity of variable density  
574 spiral fMRI,” *Magn. Reson. Med.*, vol. 70, no. 6, pp. 1634–1643, 2013.
- 575 [11] O. Jeromin, M. S. Pattichis, and V. D. Calhoun, “Optimal compressed sensing reconstructions of  
576 fMRI using 2D deterministic and stochastic sampling geometries,” *Biomed. Eng. Online*, vol. 11,  
577 no. 25, pp. 1–36, 2012.
- 578 [12] X. Zong, J. L. Lee, A. Poplawsky, S.-G. Kim, and J. C. Ye, “Compressed Sensing fMRI using  
579 Gradient-recalled Echo and EPI Sequences,” *Neuroimage*, vol. 92, no. 2, pp. 312–321, 2014.
- 580 [13] C. Chavarrías, J. F. P. J. Abascal, P. Montesinos, and M. Desco, “Exploitation of temporal  
581 redundancy in compressed sensing reconstruction of fMRI studies with a prior-based algorithm  
582 (PICCS),” *Med. Phys.*, vol. 42, no. 7, pp. 3814–3821, 2015.
- 583 [14] Z.-P. Liang, “Spatiotemporal Imaging with Partially Separable Functions,” *IEEE Int. Symp.*  
584 *Biomed. Imaging*, vol. 2, pp. 988–991, 2007.
- 585 [15] M. Chiew, S. M. Smith, P. J. Koopmans, N. N. Graedel, T. Blumensath, and K. L. Miller, “k-t  
586 FASTER: Acceleration of functional MRI data acquisition using low rank constraints,” *Magn.*  
587 *Reson. Med.*, vol. 74, no. 2, pp. 353–364, 2015.
- 588 [16] H. Pedersen, S. Kozerke, S. Ringgaard, K. Nehrke, and Y. K. Won, “k-t PCA: Temporally  
589 constrained k-t BLAST reconstruction using principal component analysis,” *Magn. Reson. Med.*,  
590 vol. 62, no. 3, pp. 706–716, 2009.
- 591 [17] H. Jung, K. Sung, K. S. Nayak, E. Y. Kim, and J. C. Ye, “k-t FOCUSS: A general compressed  
592 sensing framework for high resolution dynamic MRI,” *Magn. Reson. Med.*, vol. 61, no. 1, pp. 103–  
593 116, 2009.
- 594 [18] C. Qin *et al.*, “k-t NEXT: Dynamic MR Image Reconstruction Exploiting Spatio-temporal  
595 Correlations,” pp. 1–9, 2019.
- 596 [19] R. Otazo, E. J. Candès, and D. K. Sodickson, “Low-rank plus sparse matrix decomposition for  
597 accelerated dynamic MRI with separation of background and dynamic components,” *Magn. Reson.*  
598 *Med.*, vol. 73, no. 3, pp. 1125–1136, 2015.
- 599 [20] A. Y. Petrov, M. Herbst, and V. Andrew Stenger, “Improving temporal resolution in fMRI using a

- 600 3D spiral acquisition and low rank plus sparse (L+S) reconstruction,” *Neuroimage*, vol. 157, no.  
601 August 2016, pp. 660–674, 2017.
- 602 [21] P. Aggarwal and A. Gupta, “Double temporal sparsity based accelerated reconstruction of  
603 compressively sensed resting-state fMRI,” *Comput. Biol. Med.*, vol. 91, pp. 255–266, 2017.
- 604 [22] Z. Fang, N. Van Le, M. K. Choy, and J. H. Lee, “High spatial resolution compressed sensing  
605 (HSPARSE) functional MRI,” *Magn. Reson. Med.*, vol. 76, no. 2, pp. 440–455, 2016.
- 606 [23] V. Singh, A. H. Tewfik, and D. B. Rens, “Under-sampled functional MRI using low-rank plus  
607 sparse matrix decomposition,” *IEEE Int. Conf. Acoust. Speech Signal Process.*, pp. 897–901, 2015.
- 608 [24] P. Aggarwal, P. Shrivastava, T. Kabra, and A. Gupta, “Optshrink LR + S: accelerated fMRI  
609 reconstruction using non-convex optimal singular value shrinkage,” *Brain Informatics*, vol. 4, no.  
610 1, pp. 65–83, 2017.
- 611 [25] L. Weizman, K. L. Miller, Y. C. Eldar, and M. Chiew, “PEAR: PERiodic and fixed Rank separation  
612 for fast fMRI,” *Med. Phys.*, vol. 44, no. 12, pp. 6166–6182, 2017.
- 613 [26] H. Jung, J. C. Ye, and E. Y. Kim, “Improved k-t BLAST and k-t SENSE using FOCUSS,” *Phys.  
614 Med. Biol.*, vol. 52, no. 11, pp. 3201–3226, 2007.
- 615 [27] M. J. McKeown *et al.*, “Analysis of fMRI data by blind separation into independent spatial  
616 components,” *Hum. Brain Mapp.*, vol. 6, no. 3, pp. 160–188, 1998.
- 617 [28] A. Hyvärinen, “Fast and Robust Fixed-Point Algorithms for Independent Component Analysis,”  
618 *IEEE Trans. Neural Networks*, vol. 10, pp. 626–634, 1999.
- 619 [29] C. F. Beckmann and S. M. Smith, “Probabilistic Independent Component Analysis for Functional  
620 Magnetic Resonance Imaging,” *IEEE Trans. Med. Imaging*, vol. 23, no. 2, pp. 137–152, 2004.
- 621 [30] V. Kiviniemi, J. H. Kantola, J. Jauhiainen, A. Hyvärinen, and O. Tervonen, “Independent  
622 component analysis of nondeterministic fMRI signal sources,” *Neuroimage*, vol. 19, no. 2, pp. 253–  
623 260, 2003.
- 624 [31] G. Salimi-khorshidi, G. Douaud, C. F. Beckmann, M. F. Glasser, L. Griffanti, and S. M. Smith,  
625 “Automatic Denoising of Functional MRI Data: Combining Independent Component Analysis and  
626 Hierarchical Fusion of Classifiers,” *Neuroimage*, vol. 44, no. 0, pp. 449–468, Apr. 2015.
- 627 [32] F. Lam, B. Zhao, Y. Liu, Z.-P. Liang, M. Weiner, and N. Schuff, “Accelerated fMRI using Low-  
628 Rank Model and Sparsity Constraints,” in *Proceedings of the International Society for Magnetic  
629 Resonance in Medicine 21*, 2013, vol. 21, p. 2620.
- 630 [33] M. Chiew, N. N. Graedel, J. A. McNab, S. M. Smith, and K. L. Miller, “Accelerating functional  
631 MRI using fixed-rank approximations and radial-cartesian sampling,” *Magn. Reson. Med.*, vol. 00,  
632 pp. 1–12, 2016.
- 633 [34] X. Li *et al.*, “Dual-TRACER: High resolution fMRI with constrained evolution reconstruction,”  
634 *Neuroimage*, vol. 164, no. February 2017, pp. 172–182, 2018.
- 635 [35] M. Chiew and K. L. Miller, “Improved statistical efficiency of simultaneous multi-slice fMRI by  
636 reconstruction with spatially adaptive temporal smoothing,” *Neuroimage*, vol. 203, no. August, pp.  
637 1–14, Dec. 2019.
- 638 [36] N. N. Graedel, J. A. McNab, M. Chiew, and K. L. Miller, “Motion Correction for Functional MRI

- 639 With Three-Dimensional Hybrid Radial-Cartesian EPI,” *Magn. Reson. Med.*, vol. 78, pp. 527–540,  
640 2017.
- 641 [37] J. A. Fessler and B. P. Sutton, “Nonuniform Fast Fourier Transforms Using Min-Max  
642 Interpolation,” *IEEE Trans. Signal Process.*, vol. 51, no. 2, pp. 560–574, 2003.
- 643 [38] P. Jain, P. Netrapalli, and S. Sanghavi, “Low-rank Matrix Completion using Alternating  
644 Minimization,” in *Proceedings of the 45th annual ACM symposium on Symposium on theory of*  
645 *computing*, 2013, pp. 665–674.
- 646 [39] Y. Koren, “Collaborative filtering with temporal dynamics,” *Commun. ACM*, vol. 53, no. 4, pp.  
647 447–456, 2009.
- 648 [40] J. A. McNab, D. Gallichan, and K. L. Miller, “3D steady-state diffusion-weighted imaging with  
649 trajectory using radially batched internal navigator echoes (TURBINE),” *Magn. Reson. Med.*, vol.  
650 63, no. 1, pp. 235–242, 2009.
- 651 [41] S. Winkelmann, T. Schaeffter, T. Koehler, H. Eggers, and O. Doessel, “An optimal radial profile  
652 order based on the golden ratio for time-resolved MRI,” *IEEE Trans. Med. Imaging*, vol. 26, no. 1,  
653 pp. 68–76, 2007.
- 654 [42] Y.-C. Kim, S. S. Narayanan, and K. S. Nayak, “Flexible Retrospective Selection of Temporal  
655 Resolution in Real-time Speech MRI Using a Golden-Ratio Spiral View Order,” *Magn. Reson.*  
656 *Med.*, vol. 48, no. Suppl 2, pp. 1–6, 2011.
- 657 [43] T. Zhang, J. M. Pauly, S. S. Vasanawala, and M. Lustig, “Coil compression for accelerated imaging  
658 with Cartesian sampling,” *Magn. Reson. Med.*, vol. 69, no. 2, pp. 571–582, 2013.
- 659 [44] M. Buehrer, K. P. Pruessmann, P. Boesiger, and S. Kozerke, “Array compression for MRI with  
660 large coil arrays,” *Magn. Reson. Med.*, vol. 57, no. 6, pp. 1131–1139, 2007.
- 661 [45] M. Welvaert and Y. Rosseel, “On the definition of signal-to-noise ratio and contrast-to-noise ratio  
662 for fMRI data,” *PLoS One*, vol. 8, no. 11, p. 1010, 2013.
- 663 [46] M. Chiew, N. N. Graedel, and K. L. Miller, “Recovering task fMRI signals from highly under-  
664 sampled data with low-rank and temporal subspace constraints,” *Neuroimage*, vol. 174, pp. 97–110,  
665 2018.
- 666 [47] Z. Wang, A. C. Bovik, H. R. Sheikh, and E. P. Simoncelli, “Image quality assessment: From error  
667 visibility to structural similarity,” *IEEE Trans. Image Process.*, vol. 13, no. 4, pp. 600–612, 2004.
- 668 [48] A. V. Knyazev and M. E. Argentati, “Principal Angles Between Subspaces in an A-Based Scalar  
669 Product: Algorithms and Estimates,” *Soc. Ind. Appl. Math. J. Sci. Comput.*, vol. 23, no. 6, pp.  
670 2008–2040, 2002.
- 671 [49] A. Hyvärinen and E. Oja, “Independent Component Analysis : Algorithms and Applications,”  
672 *Neural Networks*, vol. 13, no. 4–5, pp. 411–430, 2000.
- 673 [50] S. M. Smith *et al.*, “Advances in functional and structural MR image analysis and implementation  
674 as FSL,” *Neuroimage*, vol. 23, no. SUPPL. 1, pp. 208–219, 2004.
- 675 [51] M. Jenkinson and S. M. Smith, “A global optimisation method for robust affine registration of brain  
676 images,” *Med. Image Anal.*, vol. 5, no. 2, pp. 143–156, 2001.
- 677 [52] R. Ahmad, C. D. Austin, and L. C. Potter, “Toeplitz embedding for fast iterative regularized

- 678 imaging,” in *Proceedings of the SPIE*, 2011, vol. 8051, pp. 1–10.
- 679 [53] R. H. Chan and M. K. Ng, “Conjugate Gradient Methods for Toeplitz Systems,” *Soc. Ind. Appl.*  
680 *Math.*, vol. 38, no. 3, pp. 427–482, 1996.
- 681 [54] E. J. Candès and B. Recht, “Exact Matrix Completion via Convex Optimization,” *Found. Comput.*  
682 *Math.*, vol. 9, no. 6, pp. 717–772, 2008.
- 683 [55] E. J. Candès and T. Tao, “The Power of Convex Relaxation : Near-Optimal Matrix Completion,”  
684 *IEEE Trans. Inf. Theory*, vol. 56, pp. 2053–2080, 2009.

685

## 686 **Appendix A: Pseudocode**

687

688 *Input*

689 d: multicoil under-sampled k-t fMRI data

690 E: Sampling and multi-coil encoding operator

691  $\lambda_X$ : spatial regularization weighting factor

692  $\lambda_T$ : temporal regularization weighting factor

693  $\lambda_V$ : temporal smoothness regularization weighting factor

694

695 *%Initialize*

696  $X_{\text{prior0\_col}_1}$ : Temporal Mean (The average image over all time)

697  $X_{\text{prior0\_cols}_{2:r}}$ : 0

698  $T_{\text{prior0}}$ : Randomly orthogonal rows

699

700 *%Create Priors*

701  $d_{\text{win}} = \text{window}(d)$

701 **while** not converged **do**

702  $X_{\text{prior}_{i+1}} \leftarrow \underset{X_{\text{prior}}}{\text{argmin}} \left( \|E(X_{\text{prior}} T_{\text{prior}_i}') - d_{\text{win}}\|_2^2 \right)$

703  $T_{\text{prior}_{i+1}} \leftarrow \underset{T_{\text{prior}}}{\text{argmin}} \left( \|E(X_{\text{prior}_{i+1}} T_{\text{prior}}') - d_{\text{win}}\|_2^2 \right)$

704 **end while**

705

706 *%Final Reconstruction*

708  $X_0 = X_{\text{prior}}$

709  $T_0 = T_{\text{prior}}$

710

711 **while** not converged **do**

712  $X_{i+1} \leftarrow \underset{X}{\text{argmin}} \left( \|E(X T_i') - d\|_2^2 + \lambda_X \|X - X_{\text{prior}}\|_2^2 \right)$

713  $T_{i+1} \leftarrow \underset{T}{\text{argmin}} \left( \|E(X_{i+1} T') - d\|_2^2 + \lambda_T \|T - T_{\text{prior}}\|_2^2 + \lambda_V \|\nabla T\|_2^2 \right)$

714 **end while**

715

716 *%Output*

717  $D = X * T'$ : Final reconstructed x-t fMRI data

718

719 Test code for running the main algorithm of this paper can be found at  
720 <https://github.com/harrytmason/constrained-lowrank-recon>, and the data can be downloaded from ORA once it is  
721 made public (it is currently being processed). A link to the data will be provided in the readme file of the code.  
722

722

## 723 **Appendix B : Implementation Details**

724

725 There are a few ways to tackle a k-t space reconstruction problem that constructs a low-rank matrix (e.g. minimizing  
726 the nuclear norm: the sum of the singular values [54]; or matrix completion [55]). The approach used in our  
727 formulation is known as alternating minimization [38], which reconstructs the decomposed matrices at a fixed rank,  
728 pre-selecting an arbitrary low-rank value below the maximum potential rank of the system. Each row in X  
729 represents a separate voxel, each row in T represents a frame in time, and the rank is encoded through the columns  
730 of both matrices. An additional adaptation employed during prior generation is the forced orthogonalization of the  
731 system when alternating between the two subproblems where no alternate regularization exists (e.g. where  $\lambda_X = \lambda_T =$   
732  $0$ ).

733

734 Our reconstruction problem was solved using the minres.m function in MATLAB R2019a. NUFFT calculations used  
735 the Fessler toolbox [37]. Canonical correlations were calculated using the subspacea.m function [48] rather than the  
736 inbuilt cancorr.m function, in order to avoid the extra alignment that occurs during demeaning (which is only  
737 significant for low canonical correlation scores).

738

739 For windowing, a Tukey parameter of 0.4 was used with full-width half-maximum at  $\frac{\pi * k_{max}}{2R}$ . For generation of the  
740 priors, a 1D Tukey window was applied along each acquired blade in k-space, and a 2D version of the window was  
741 applied to the priors in Cartesian k-t space post prior-generation, but pre-final reconstruction with the full k-space.  
742 This ensured no leakage of energy into the higher frequencies, as the windowed data in a consistency term does not  
743 strictly enforce the output to only the central k-space.

744

745 The overall convergence criterion was a normalized cost function gradient; it was evaluated relative to the cost  
746 function at the previous post temporal subproblem iteration after the temporal subproblem in each cycle. The CCS  
747 metric was used to establish robustness within a given acceleration factor with respect to the convergence criterion,  
748 by reconstructing from different randomly initialized X and T matrices and measuring the agreement of those  
749 reconstructions with respect to the principal angles at different levels of convergence. The reconstructions were  
750 carried out through a k-t FASTER reconstruction of retrospective dataset A, and are shown in Supplementary Figure  
751 1.

752

753 The differing size of the spatial and temporal subproblem means the spatial and temporal problems require  
754 different convergence and/or iteration parameters (typically there are 1-2 orders of magnitude more voxels than  
755 frames). We chose parameters that made the system spend 10x as long in the spatial subproblem (50 iterations per  
756 temporal subproblem, 500 per spatial subproblem, with a subproblem tolerance of  $10^{-15}$  in case of early  
757 convergence). The effect of varying the number of iterations of each subproblem against the cycles between the  
758 subproblem is shown in Supplementary Figure 2. An internal iteration number of 50 was chosen to guarantee  
759 convergence, but this has the potential to be optimized for speed.

760

761 Toeplitz embedding exploits the Gram matrix ( $E'E$ ) formed by Fourier encoding to produce a block Toeplitz  
762 structure. These can be embedded in block Circulant matrices, which can be fully explained by their first column,



763 and are diagonalized by FFTs. Toeplitz Embedding speeds up the computation from  $O(N^2)$  to  $O(N\log N)$ . Mark  
764 Chiew's tools for implementing can be found at <https://users.fmrib.ox.ac.uk/~mchiew/tools.html>.

765

766 **Supplementary Figures**

767

## Convergence Consistency within an Acceleration Factor

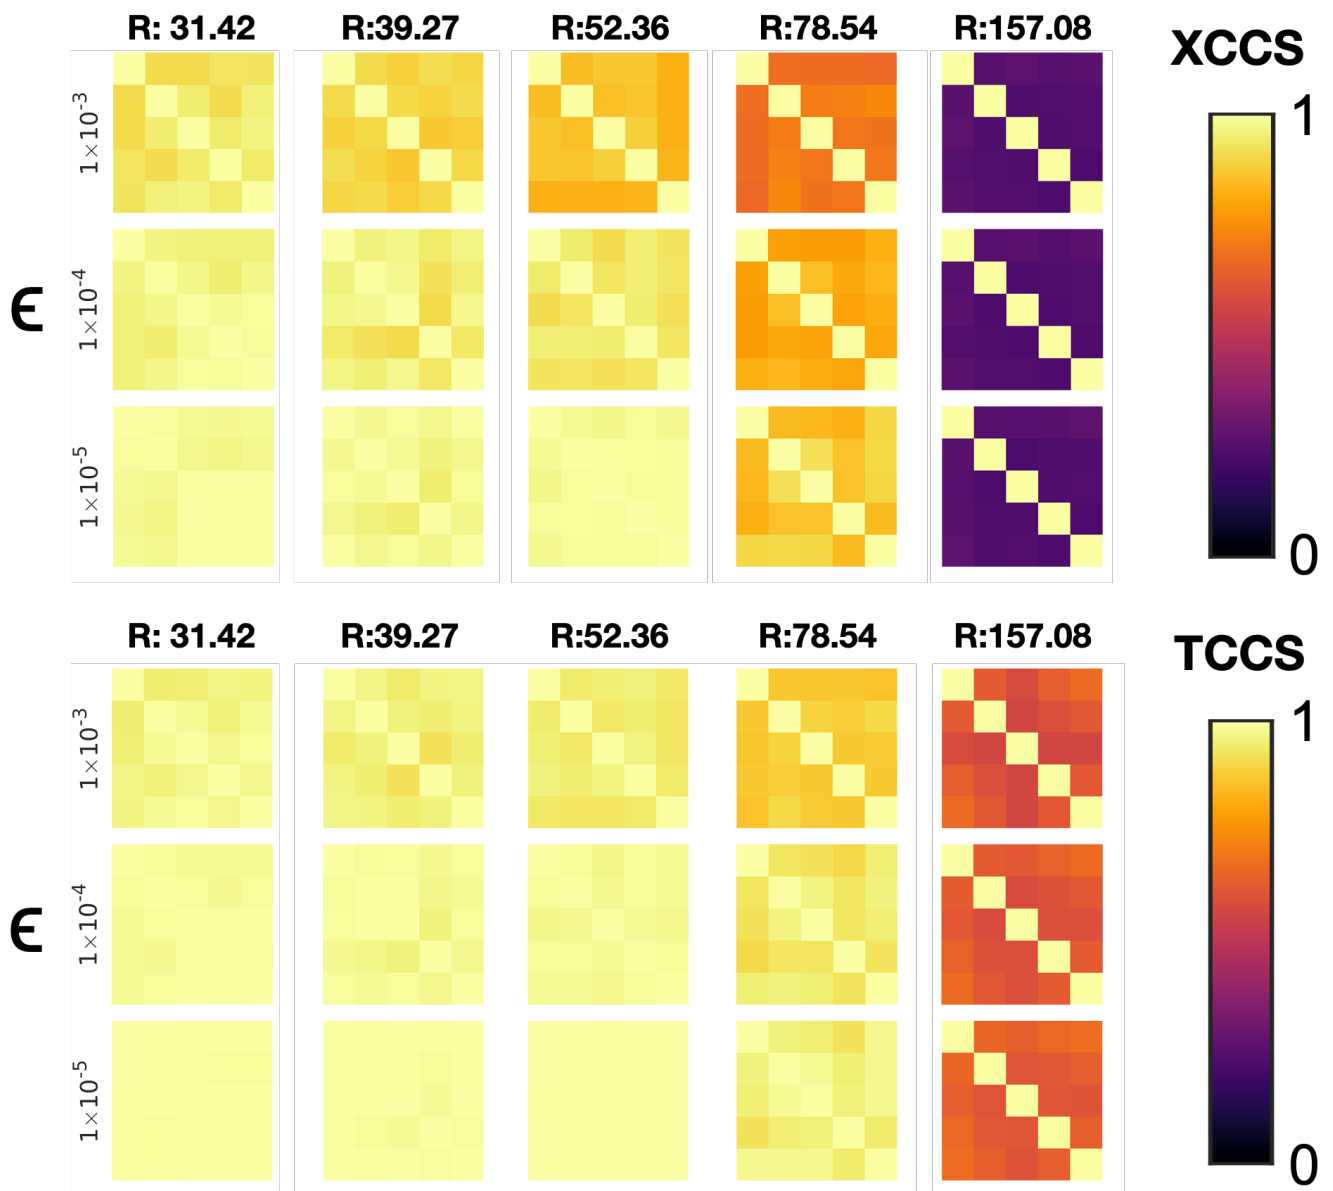

768

769 **Supplementary Figure 1:** A measure of the robustness of the k-t FASTER algorithm. At each different  
770 acceleration factor (columns), five different reconstructions with randomly orthogonal initialization and a temporal  
771 mean as the first component were carried out. The result was saved at four different relative absolute gradients of  
772 the cost function (rows). The CCS between these different initializations is then shown in each grid, with the  
773 diagonal indicating a self-CCS of 1. It is worth noting that random non-orthogonal initializations showed much  
774 poorer convergence to a single solution.

775

776

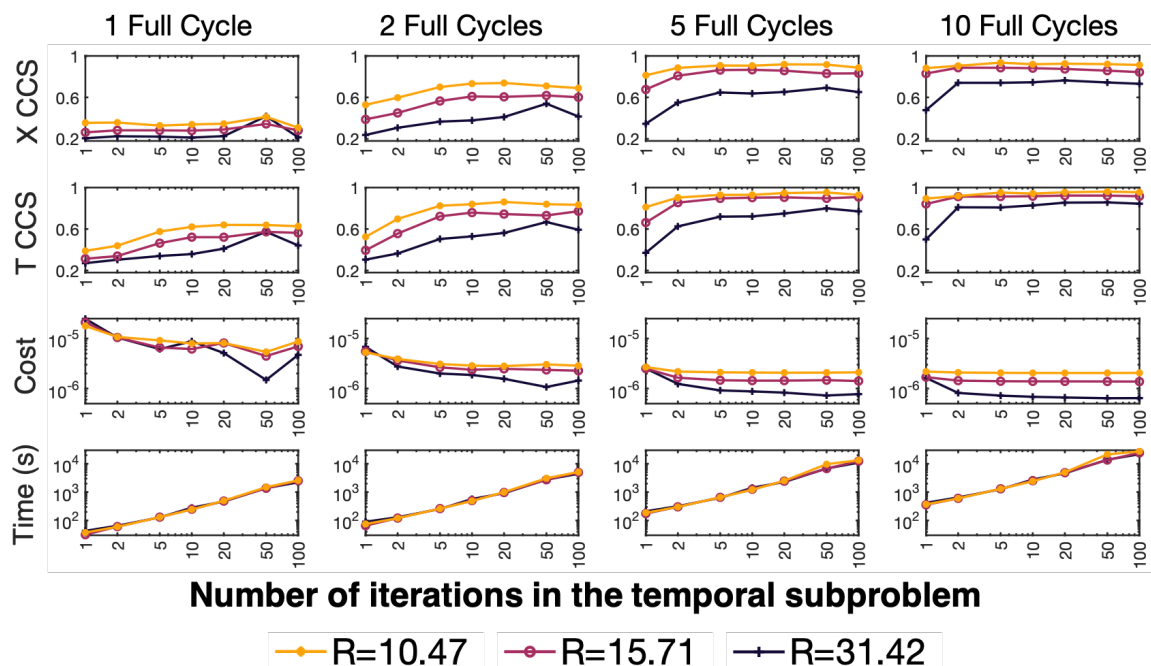

777

778

**Supplementary Figure 2:** Various criteria (Row 1: X CCS, Row 2: T CCS, Row 3: Cost, Row 4: Time) are used to judge the reconstruction performance with varying iteration numbers in the subproblems. Three different acceleration factors are shown (R=31.42, 5 blades/frame; R=15.71, 10 blades/frame; R=10.47, 15 blades/frame) across a range of cycles (shown in each column). The number of iterations in the spatial subproblem was  $10\times$  higher. These results were acquired using alternating minimization k-t FASTER on retrospective dataset A.

779

780

781

782

### High SNR Results

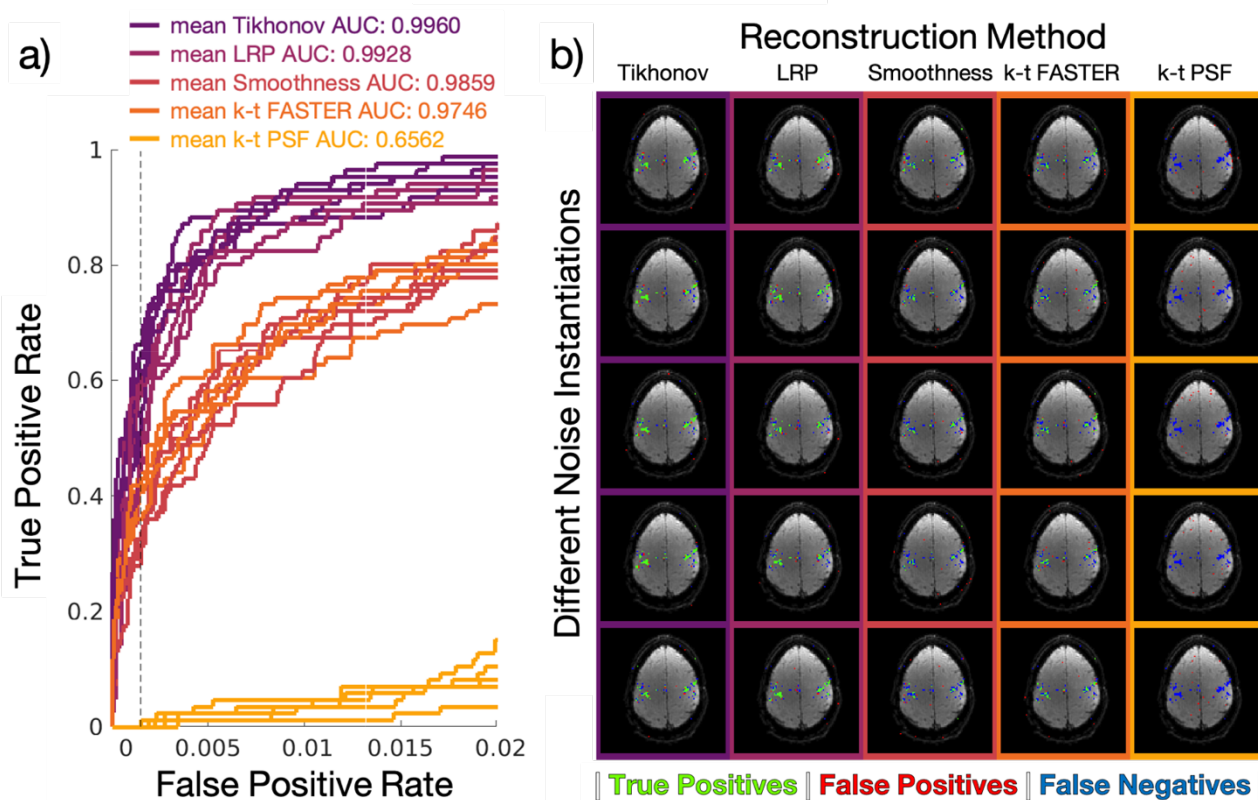

783

784

785

786

**Supplementary figure 3:** The full set of reconstructions for high SNR in retrospective dataset B. a) The ROC curves for all five instantiations of the noise, when subjected to the different reconstruction methods. The mean AUC across the entire curve is included in the legend. b) The activation maps of all three methods for each individual instantiation of the noise.

## Medium SNR Results

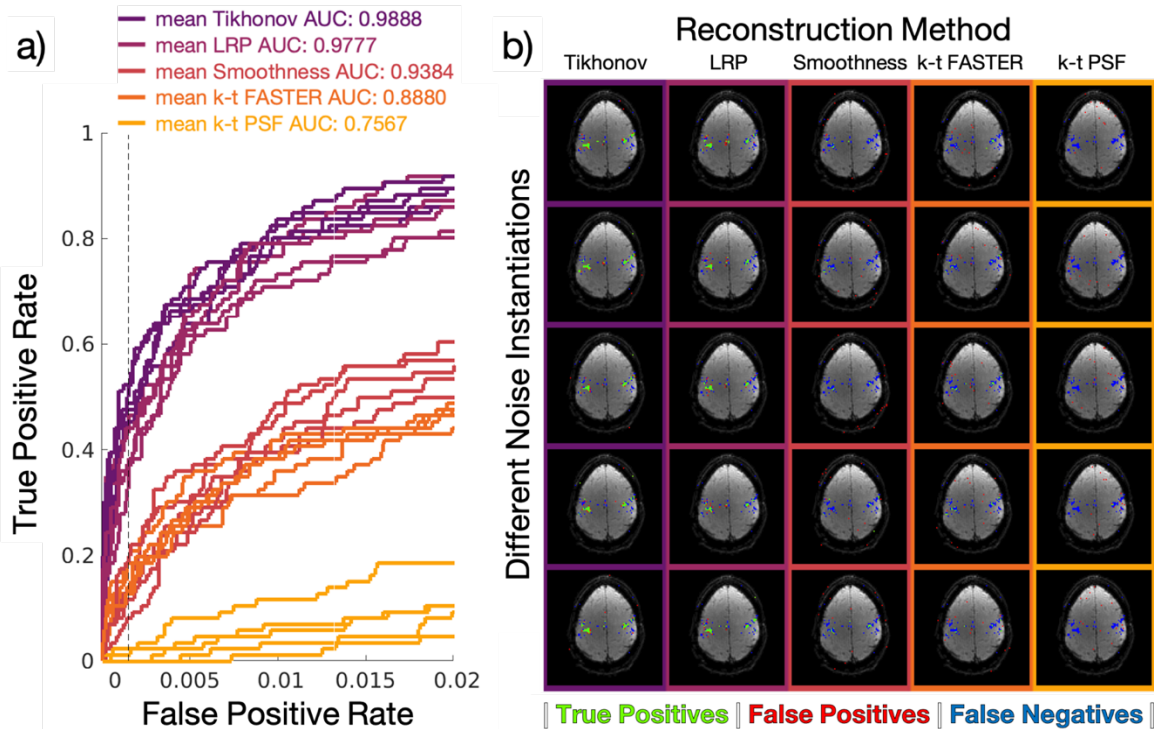

787 **Supplementary figure 4:** The full set of reconstructions for medium SNR in retrospective dataset B. a) The ROC  
788 curves for all five instantiations of the noise, when subjected to the different reconstruction methods. The mean  
789 AUC across the entire curve is included in the legend. b) The activation maps of all three methods for each  
790 individual instantiation of the noise.  
791

## Low SNR Results

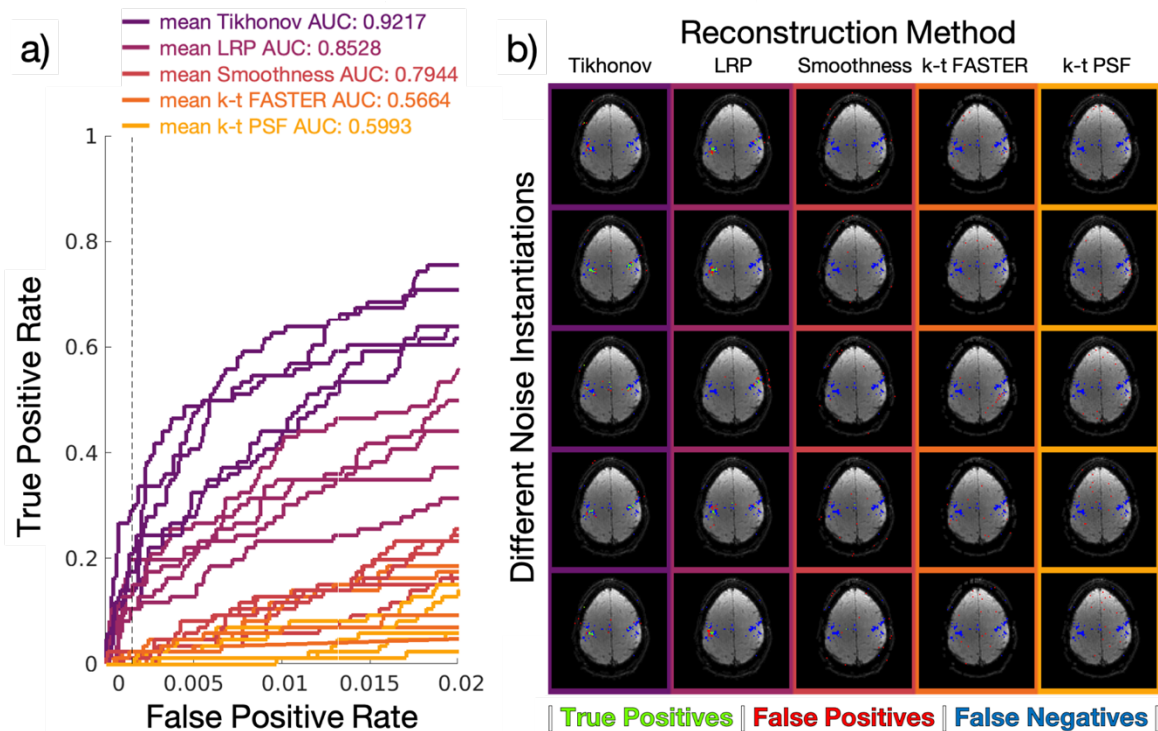

792 **Supplementary figure 5:** The full set of reconstructions for low SNR in retrospective dataset B. a) The ROC  
793 curves for all five instantiations of the noise, when subjected to the different reconstruction methods. The mean  
794 AUC across the entire curve is included in the legend. b) The activation maps of all three methods for each  
795 individual instantiation of the noise.

# R:7.85

## Reconstruction Method

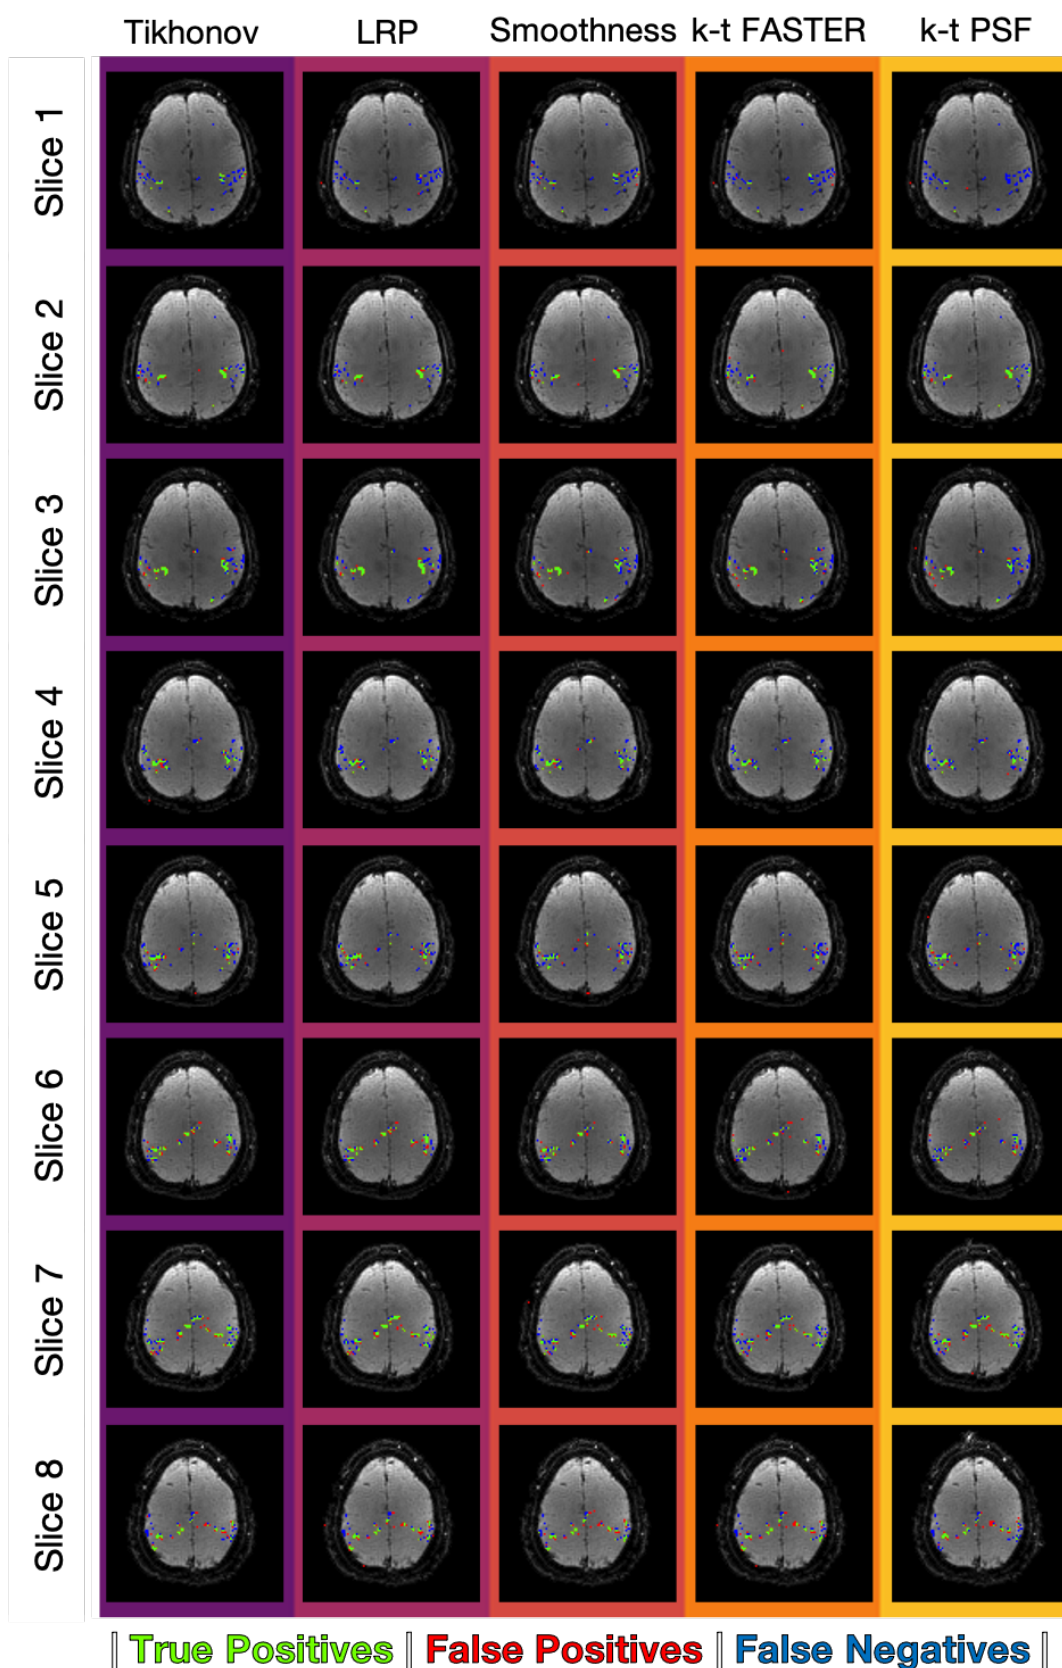

796

797

798

799

**Supplementary figure 6:** The activation maps for all eight slices for prospective reconstruction at  $R = 7.85$  across the k-t reconstruction methods. The maps were thresholded according to the z-statistic equivalent to a false positive rate of 0.15% (Figure 8). Green pixels represent true positives, blue is false negatives, red is false positives.

# R:15.71

## Reconstruction Method

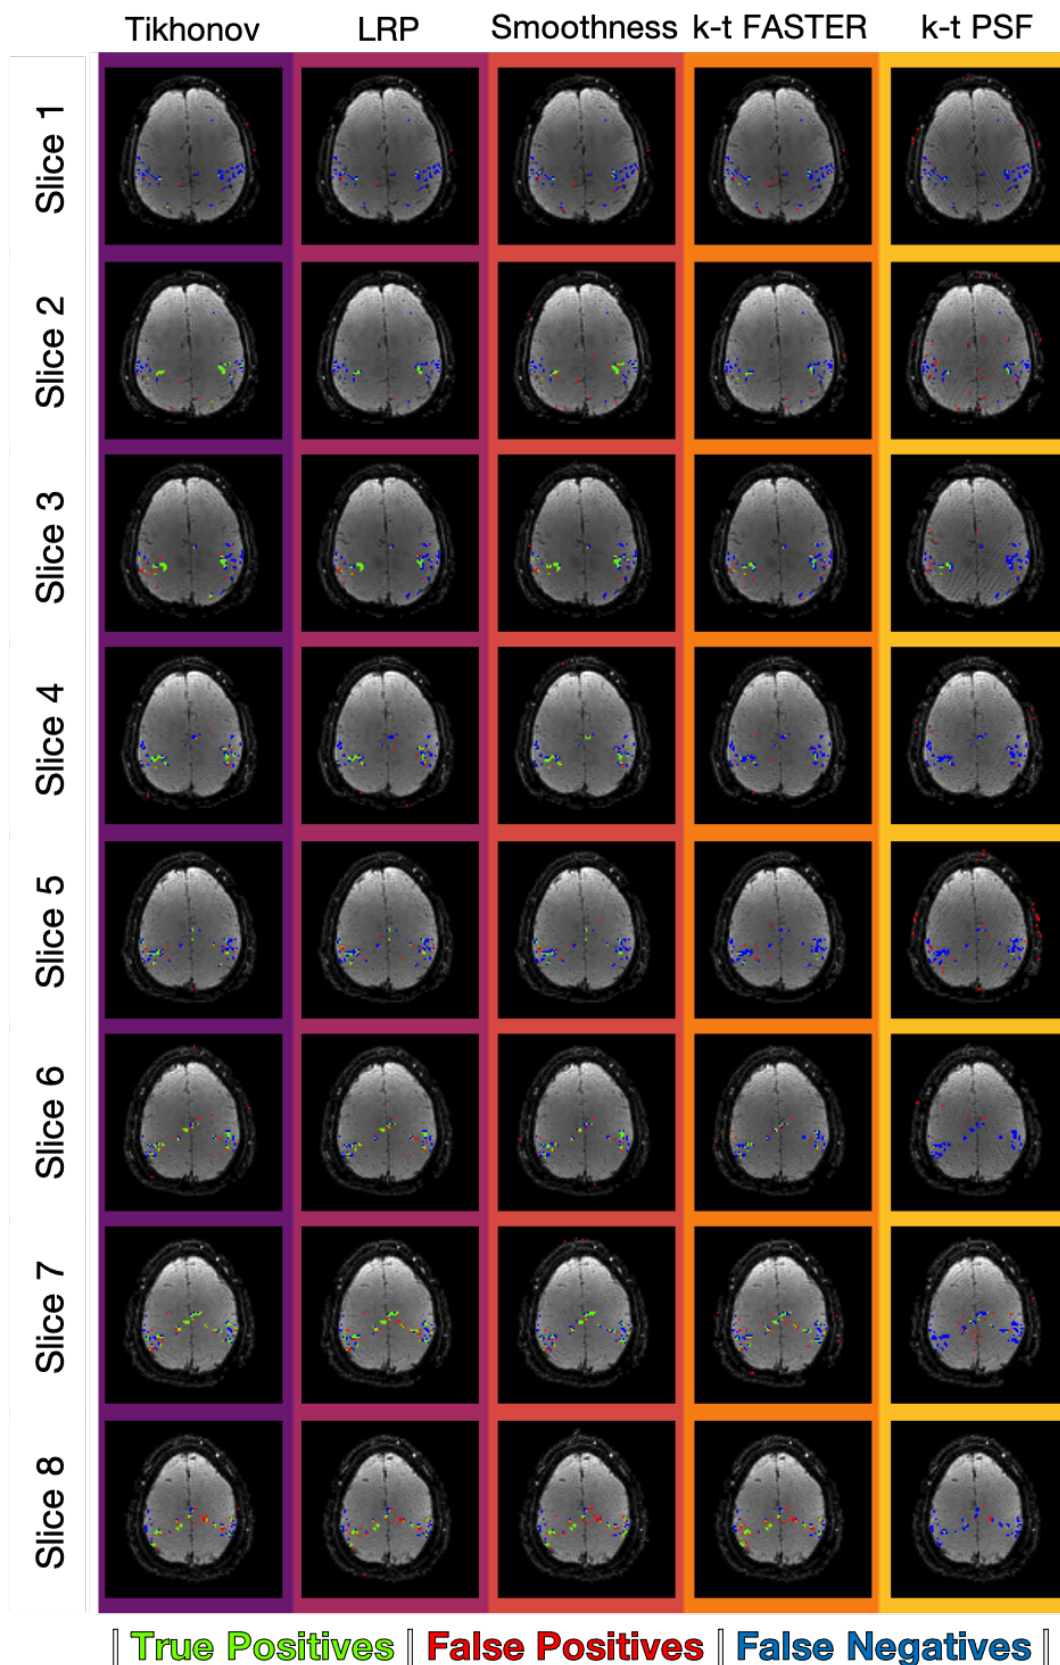

800

801

802

803

**Supplementary figure 7:** The activation maps for all eight slices for prospective reconstruction at  $R = 15.71$  across the k-t reconstruction methods. The maps were thresholded according to the z-statistic equivalent to a false positive rate of 0.15% (Figure 8). Green pixels represent true positives, blue is false negatives, red is false positives.

# R:26.18

## Reconstruction Method

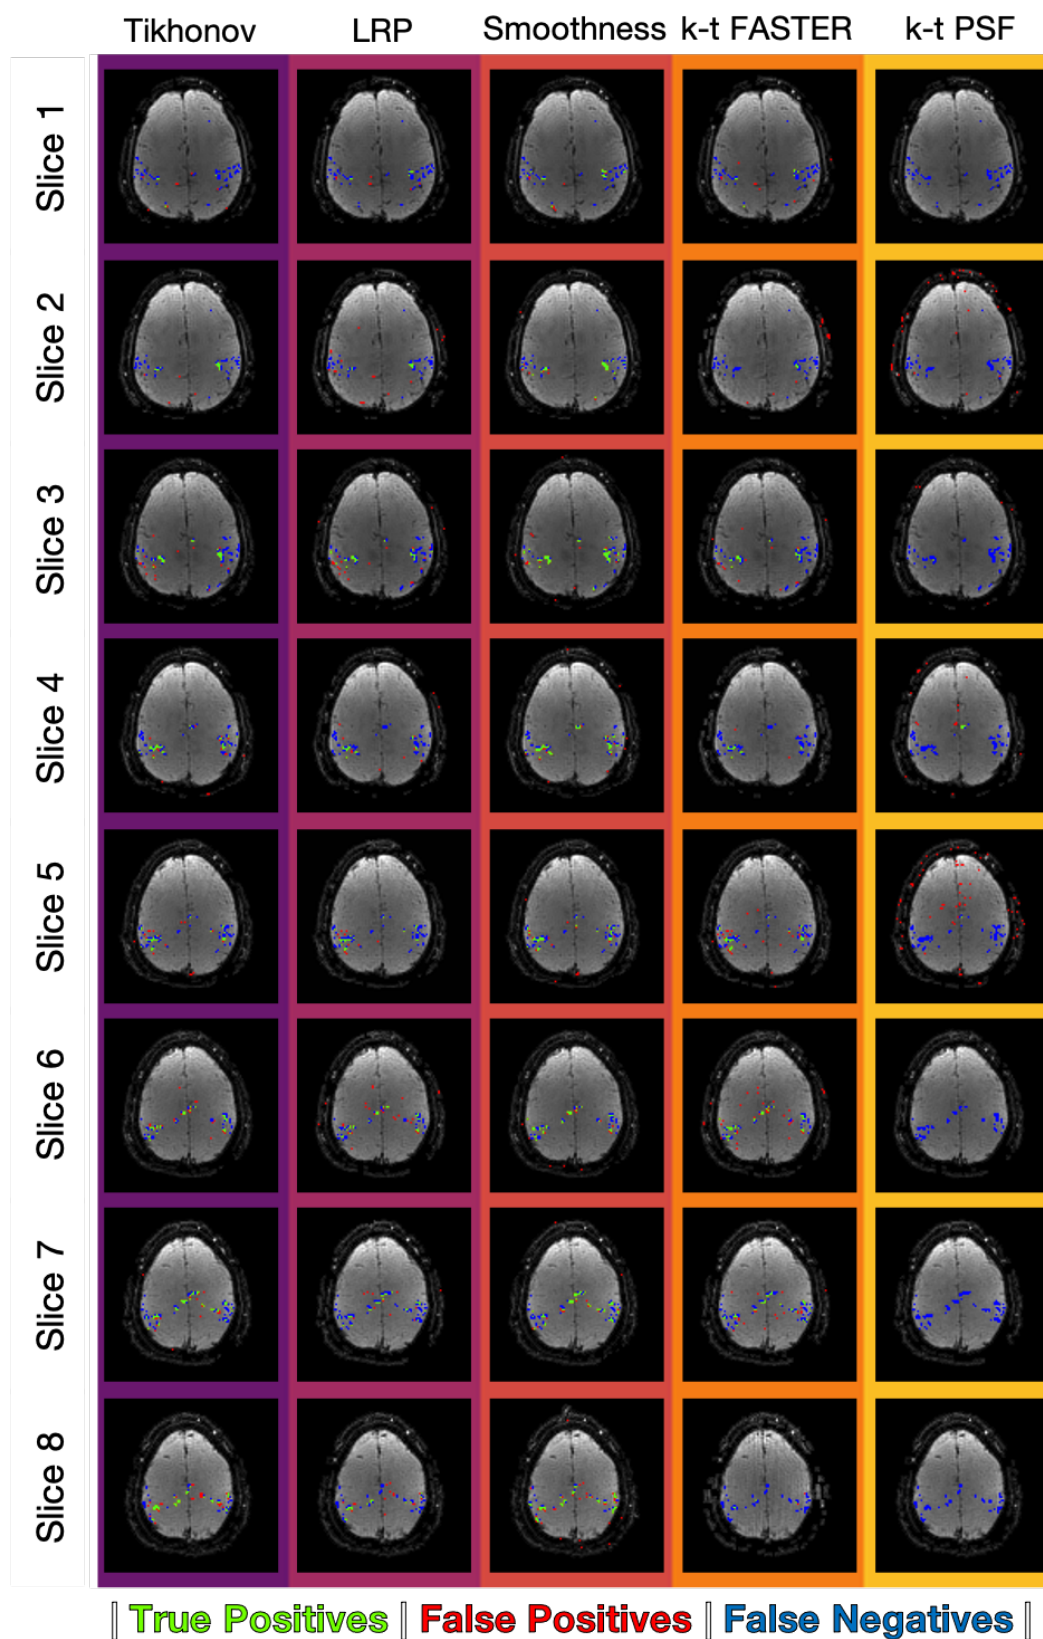

804

805

806

807

808

**Supplementary figure 8:** The activation maps for all eight slices for prospective reconstruction at  $R = 26.18$  across the k-t reconstruction methods. The maps were thresholded according to the z-statistic equivalent to a false positive rate of 0.15% (Figure 8). Green pixels represent true positives, blue is false negatives, red is false positives.

809 **ACKNOWLEDGEMENTS**

810

811 Computation used the Oxford Biomedical Research Computing (BMRC) facility, a joint development between the  
812 Wellcome Centre for Human Genetics and the Big Data Institute supported by Health Data Research UK and the  
813 NIHR Oxford Biomedical Research Centre. The views expressed are those of the author(s) and not necessarily those  
814 of the NHS, the NIHR or the Department of Health.

815

816 This work was supported by funding from the Engineering and Physical Sciences Research Council (EPSRC) and  
817 Medical Research Council (MRC) [HTM, grant number EP/L016052/1], the Royal Academy of Engineering (MC,  
818 RF201617\16\23) and the Wellcome Trust (KLM, 202788/Z/16/Z). The Wellcome Centre for Integrative  
819 Neuroimaging is supported by core funding from the Wellcome Trust (203139/Z/16/Z), and The Wellcome Centre  
820 for Human Neuroimaging is supported by core funding from the Wellcome Trust [203147/Z/16/Z].

821

822
